# Supplementary material for: Rapid drift of the Tethyan Himalaya terrane before two-stage India-Asia collision
Source: PubMed Central journal article supplement (PMC8310735; doi:10.1093/nsr/nwaa173), 2020-07-27
Supplement: nwaa173_supplemental_file.pdf [file nwaa173_supplemental_file.pdf]

1 **Supplementary Materials for**

2

3 **Rapid drift of the Tethyan Himalaya terrane before two-stage**

4 **India-Asia collision**

5

6 Jie Yuan, Zhenyu Yang\*, Chenglong Deng\*, Wout Krijgsman, Xiumian Hu, Shihu Li,

7 Zhongshan Shen, Huafeng Qin, Wei An, Huaiyu He, Lin Ding, Zhengtang Guo and

8 Rixiang Zhu

9

10 \*Corresponding authors. Emails: cldeng@mail.iggcas.ac.cn;

11 zhenyu.yang@cnu.edu.cn.

12

13 **This file includes:**

14       Supplementary Notes 1 to 4

15       Supplementary Figs 1 to 14

16       Supplementary Tables 1 to 4

17       Supplementary References

18

19 **Supplementary Note 1: Geologic settings**

20 The Indus-Yalung Tsangpo Suture (Fig. 1b) represents the collision zone between  
21 the Lhasa and Tethyan Himalaya terranes, and thus between the Indian and Asian  
22 continents, during the early Cenozoic. It comprises the late Triassic–Eocene Gangdese  
23 magmatic arc, the early Cretaceous–Paleocene Xigaze forearc basin and the  
24 accretionary prism [1–4]. To the south, Ordovician–Eocene Tethyan Himalaya strata  
25 were deposited on the Indian continental passive margin, with shallow-water  
26 platform-facies deposits in the south (southern Tethyan Himalaya) to deep-water  
27 facies in the north (northern Tethyan Himalaya) [5].

28 In the Gyangze basin (Fig. 1c), Jurassic–Cretaceous strata were continuously  
29 deposited in a continental slope environment, sourced from the Indian continent [6–8].  
30 The deep-water Cretaceous strata are subdivided into a lower (Gyabula Formation)  
31 and an upper (Chuangde Formation) unit [7]. The Gyabula Formation is composed of  
32 dark gray siliceous/calcareous shales, siltstones, and turbidite beds and is conformably  
33 overlain by the Chuangde Formation. The presence of fossil belemnites, ammonites,  
34 foraminifera and radiolarian in the Gyabula Formation indicates a lower continental  
35 slope depositional environment [7]. The Chuangde Formation of Santonian–  
36 Campanian age consists of CORBs, here represented as violet-red shales intercalated  
37 with thin marlstone beds [6,8,9]. Facies assemblages also suggest that the CORBs in  
38 the Cailangba section, that is located in the western part of the Gyangze area (Fig. 1c),  
39 were deposited in outer base-of-slope apron to deep basin environments [6]. The  
40 Cailangba B section is about 30 m thick and mainly consists of purple medium  
41 bedded limestones intercalated with conglomerates. The Cailangba A section is about  
42 16 m thick, and comprises the same lithology as the lower-middle part of section B  
43 (Supplementary Fig. 2).

44 The Sangdanlin and Mubala sections in the Saga area (Fig. 1d), ~500 km west of  
45 the Gyangze region, represent the most distal continental margin of the northern  
46 Tethyan Himalaya [10–12]. The Paleogene strata in the Saga area are commonly  
47 divided into three formations [10–13] (Supplementary Fig. 3). The uppermost  
48 Cretaceous–Paleocene Denggang Formation consists of a lower interval of shales and  
49 siltstones, with radiolarian cherts and siliceous shales, and an upper interval of  
50 sandstones intercalated with cherts and shales. Upward the Paleocene–Eocene  
51 Sangdanlin Formation and Zheya Formation are composed of a shale/chert-dominated  
52 interval and an interval of sandstones interbedded with shales and tuffs [10–14]. The  
53 deep-water Sangdanlin Formation records the provenance change from Indian sources  
54 to Asian sources while the overlying Zheya Formation is dominantly sourced from the  
55 Gangdese arc to the north [10,13,14].

56 We sampled the upper Cretaceous Cailangba A and B sections and the Paleogene  
57 Sangdanlin and Mubala sections for paleomagnetic purposes, to reconstruct the plate  
58 tectonic history of the Tethyan Himalaya terrane by determining paleolatitudinal  
59 changes through time. The samples were first subjected to detailed scanning electron  
60 microscopy (SEM) observations and rock magnetic analyses (Fig. 2) to separate and  
61 verify the primary or secondary character of the different magnetization components  
62 (Fig. 3).

63

#### 64 **Supplementary Note 2: Anisotropy of magnetic susceptibility (AMS)**

65 AMS measurements were performed using a KLY-4s Kappabridge. To avoid  
66 potential problems associated with heating, we completed the AMS measurements  
67 before any thermal demagnetization was conducted.

68 In stratigraphic coordinates, the maximum (k1) and mediate (k2) principle

69 anisotropy directions are parallel to the bedding with well grouped magnetic  
70 lineations; the minimum ( $k_3$ ) principle anisotropy directions are basically  
71 perpendicular to the bedding (Supplementary Fig. 9). These distributions suggest that  
72 the sedimentary magnetic fabrics of the samples of the Sangdanlin and Mubala  
73 sections have been subjected to incipient deformation [15]. Great-circle fitting the  
74 distribution of  $k_3$  of the Sangdanlin and Mubala sections provides planes with strike =  
75  $69.3^\circ$ , dip =  $88.3^\circ$  (Supplementary Fig. 9b) and strike =  $178.3^\circ$ , dip =  $89.2^\circ$   
76 (Supplementary Fig. 9d), respectively. We assume that the original stress pattern in  
77 both regions was the same with a north-south compression direction. Obviously a  
78 north-south compression direction inferred from the Mubala section is consistent with  
79 the regional tectonic context. We infer that a local counterclockwise rotation of  $71^\circ$  is  
80 required to fit the distribution of  $k_3$  of the Sangdanlin section with the north-south  
81 compression direction of the Mubala section. The characteristic of sedimentary  
82 magnetic fabrics of the samples in the Cailangba A and B sections is similar to that in  
83 the Sangdanlin and Mubala sections (Supplementary Figs. 9e, f).

84

### 85 **Supplementary Note 3: Fold tests**

86 The sample-mean direction is  $D_g = 163.8^\circ$ ,  $I_g = -20.4^\circ$ ,  $k = 2.7$ ,  $\alpha_{95} = 11.7^\circ$ ,  $N =$   
87 86 before tilt correction, and  $D_s = 176.3^\circ$ ,  $I_s = -18.8^\circ$ ,  $k = 35.8$ ,  $\alpha_{95} = 2.6^\circ$  after tilt  
88 correction (Supplementary Fig. 10a, b). The significant increase of precise parameter  
89  $k$  after tilt correction ( $k_s/k_g = 13.34 > F(170, 170) = 1.29$ ) indicates a positive fold test  
90 at the 95% confidence limit [16]. In the fold test of McFadden [17], the calculated  
91 values are  $\xi_{(2)\text{in situ}} = 81.56$  in geographic coordinates and  $\xi_{(2)\text{tilt corrected}} = 0.39$  after tilt  
92 correction, while the critical value is  $\xi_c = 10.79$  at 95% confidence limit, also  
93 indicating a positive fold test. Applying the progressive unfolding of Watson and

94 Enkin [18] shows a maximum precision parameter ( $k_{\max} = 35.7$ ) at 100% unfolding,  
95 and the direction ( $D_m = 356.2^\circ$ ,  $I_m = 18.7^\circ$ ,  $k = 35.7$ ,  $\alpha_{95} = 2.5^\circ$ ) is consistent with the  
96 mean direction after tilt correction (Supplementary Fig. 10).

97

#### 98 **Supplementary Note 4: Inclination shallowing test and correction**

99 Five Cailangba hand samples from 5 sampling beddings oriented on the  
100 stratigraphic bedding plane were used for anisotropy-based inclination shallowing  
101 correction. A total of 23 specimens were drilled from the 5 hand samples in the  
102 direction perpendicular to the stratigraphic bedding. These specimens were subjected  
103 to successively increasing direct current (DC) fields (in the range of 0–1000 mT)  
104 applied at a  $45^\circ$  angle to bedding plane of the sampled strata [19]. In the process of  
105 applying the DC fields, IRM parallel (IRM<sub>x</sub>) and perpendicular (IRM<sub>z</sub>) to the  
106 bedding plane of each specimen were measured after each application of the DC field  
107 [19]. Then thermal demagnetization (in the temperature range of 100–680°C) was  
108 also conducted on these specimens (Supplementary Fig. 11). The values of  
109 IRM<sub>z</sub>/IRM<sub>x</sub> (IRM perpendicular/IRM parallel) of 23 specimens ranging of 200–1000  
110 mT changed between 0.6273 and 0.7454, while those of IRM<sub>z</sub>/IRM<sub>x</sub> in the thermal  
111 demagnetization temperature interval of 650–690°C changed between 0.6176 and  
112 0.7346, respectively (Supplementary Fig. 11 and Supplementary Table 2). Having  
113 considered that the HTC<sub>s</sub> were within 650–690°C, the mean IRM<sub>z</sub>/IRM<sub>x</sub> of each  
114 hand sample in the temperature range of 650–680°C was used to calculate the mean  
115 IRM<sub>z</sub>/IRM<sub>x</sub> of the sampled Cailangba section to be 0.6502.

116 The elongation/inclination (E/I) correction can be performed on the  
117 paleomagnetic data from the Cailangba B section (78 specimens), and from the  
118 Cailangba A and B sections (127 specimens), respectively (Supplementary Fig. 12).

119 The sample-mean direction of the Cailangba B section is  $D_s = 10.5^\circ$ ,  $I_s = -26.3^\circ$ ,  $k =$   
120  $41.5$ ,  $\alpha_{95} = 2.5^\circ$  after tilt correction. The corresponding E/I corrected inclination  
121 increased to  $-34.0^\circ$ , with the best estimate between  $-26.9^\circ$  and  $-43.7^\circ$  at the 95%  
122 confidence level (Supplementary Fig. 12a). The sample-mean direction of the  
123 Cailangba A and B sections is  $D_s = 10.3^\circ$ ,  $I_s = -25.9^\circ$ ,  $k = 35.9$ ,  $\alpha_{95} = 2.1^\circ$  after tilt  
124 correction. The corresponding E/I corrected inclination increased to  $-35.0^\circ$ , with the  
125 best estimate between  $-29.5^\circ$  and  $-39.7^\circ$  at the 95% confidence level (Supplementary  
126 Fig. 12b).

127 Four Sangdanlin hand samples from 4 sampling bedding oriented on the  
128 stratigraphic bedding plane were used for anisotropy-based inclination shallowing  
129 correction. A total of 33 specimens were drilled from the 4 hand samples in the  
130 direction perpendicular to the stratigraphic bedding. These specimens were subjected  
131 to successively increasing DC fields (in the range of 0–800 mT) applied at a  $45^\circ$  angel  
132 to bedding plane of the sampled strata [19]. In the process of applying the DC fields,  
133 the IRM<sub>x</sub> and IRM<sub>z</sub> to the bedding plane of each specimen were measured after each  
134 application of the DC field [19]. Then thermal demagnetization (in the temperature  
135 range of 100–680°C) was also conducted on these specimens (Supplementary Fig. 13).  
136 The values of the IRM<sub>z</sub>/IRM<sub>x</sub> of 33 specimens in the range of 200–800 mT changed  
137 between 0.6924 and 1.0000, while those of IRM<sub>z</sub>/IRM<sub>x</sub> in the thermal  
138 demagnetization temperature interval of 650–690 °C changed between 0.5317 and  
139 0.9827, respectively (Supplementary Fig. 13 and Supplementary Table 2). Having  
140 considered that the HTC<sub>s</sub> were determined within 650–690 °C by thermal  
141 demagnetization, the mean IRM<sub>z</sub>/IRM<sub>x</sub> of each hand sample in this temperature  
142 range was used to calculate the mean IRM<sub>z</sub>/IRM<sub>x</sub> of the section to be 0.6982.

143

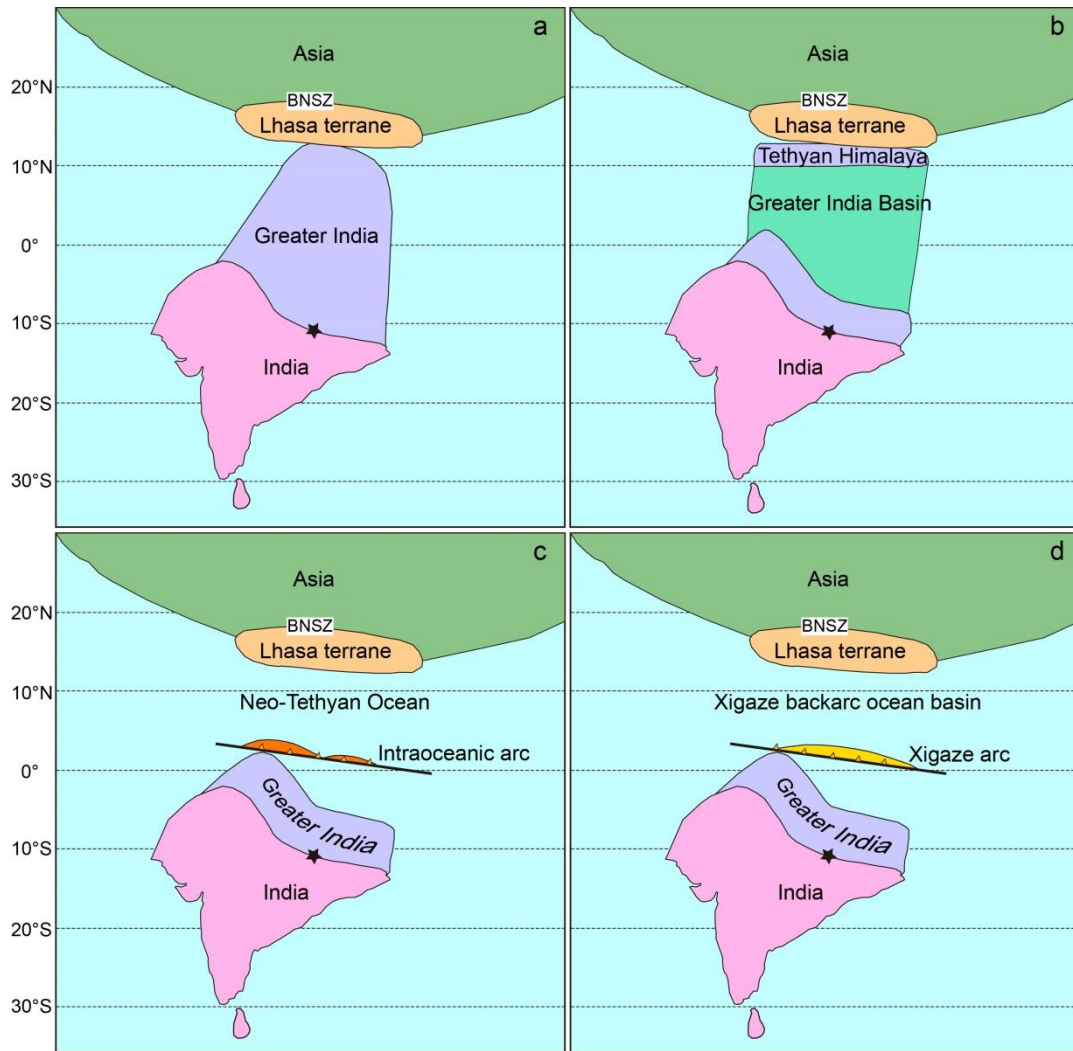

144  
145

146 **Supplementary Figure 1.** Geodynamic models for reconstructions of India-Asia  
147 paleogeography at ~60 Ma. (a) The continental Greater India model [20,21]. (b) The  
148 Greater India Basin model [22,23]. (c) The island arc-continent collision model [24].  
149 (d) The India-arc-Xigaze backarc ocean collision model [25].

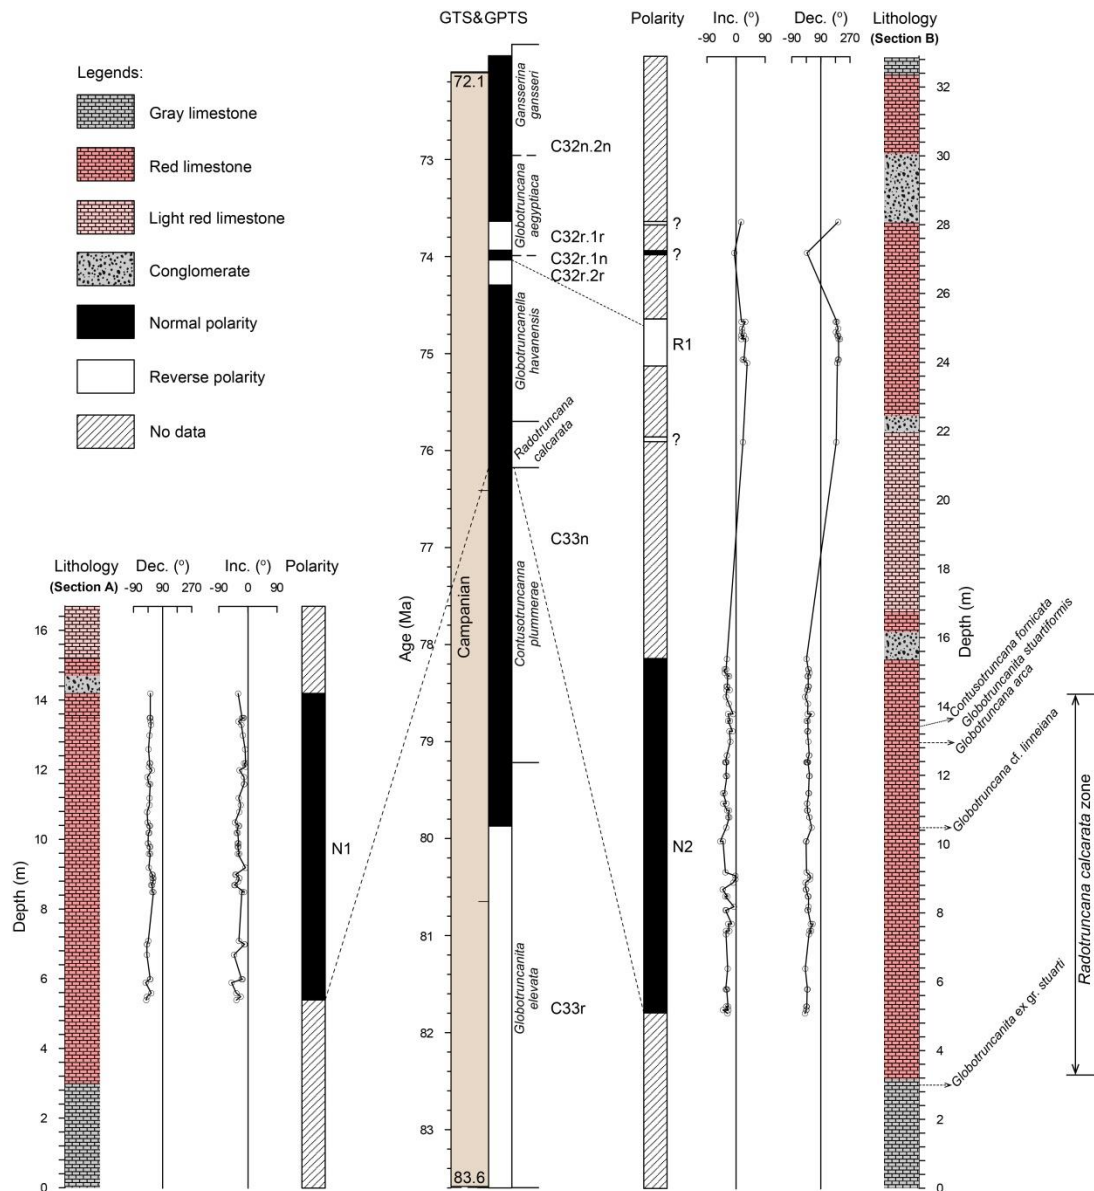

150  
151

152 **Supplementary Figure 2.** Lithology, magnetostratigraphy and biostratigraphy of the  
 153 Cailangba section. Dec., declinations; Inc., inclinations; GTS&GPTS, the geologic  
 154 time scale and the geomagnetic polarity timescale [26]. Biostratigraphic data are after  
 155 Chen *et al.* [6].



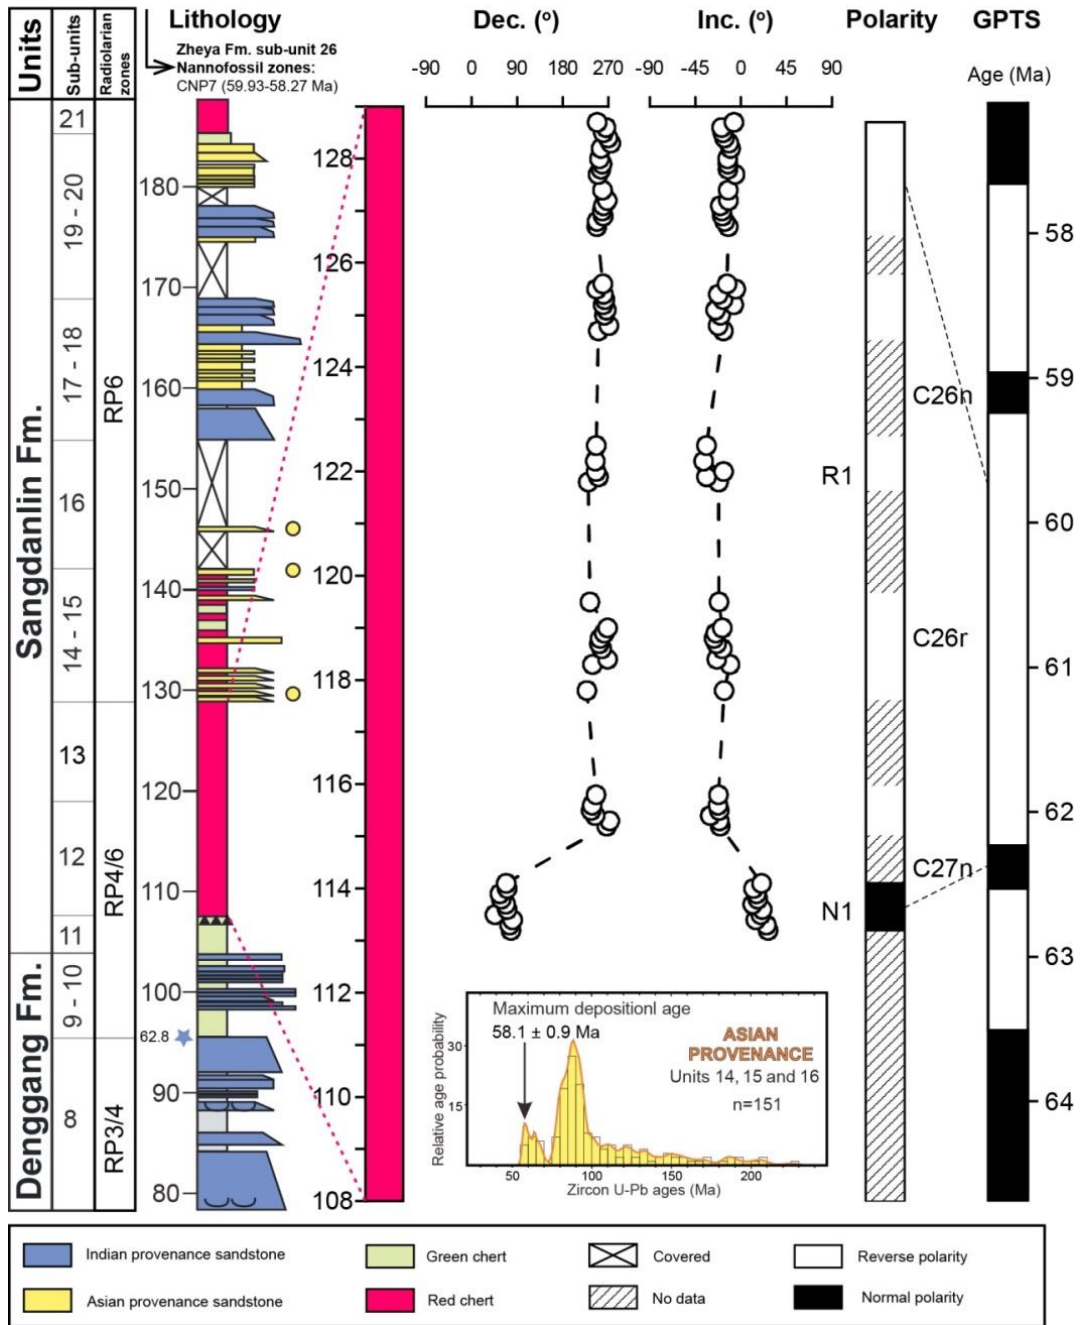

156

157

158 **Supplementary Figure 3.** Lithologic, biostratigraphic and magnetostratigraphic

159 results of the Sangdanlin red siliceous shales with declinations and inclinations plotted  
160 as a function of stratigraphic level and showing the correlation with the GPTS [26].

161 The first arrival of Asian-derived turbidites is recorded in sub-units 14–16, the  
162 maximum depositional age of which is constrained at  $58.1 \pm 0.9$  Ma by detrital zircon

163 U-Pb geochronology [13].

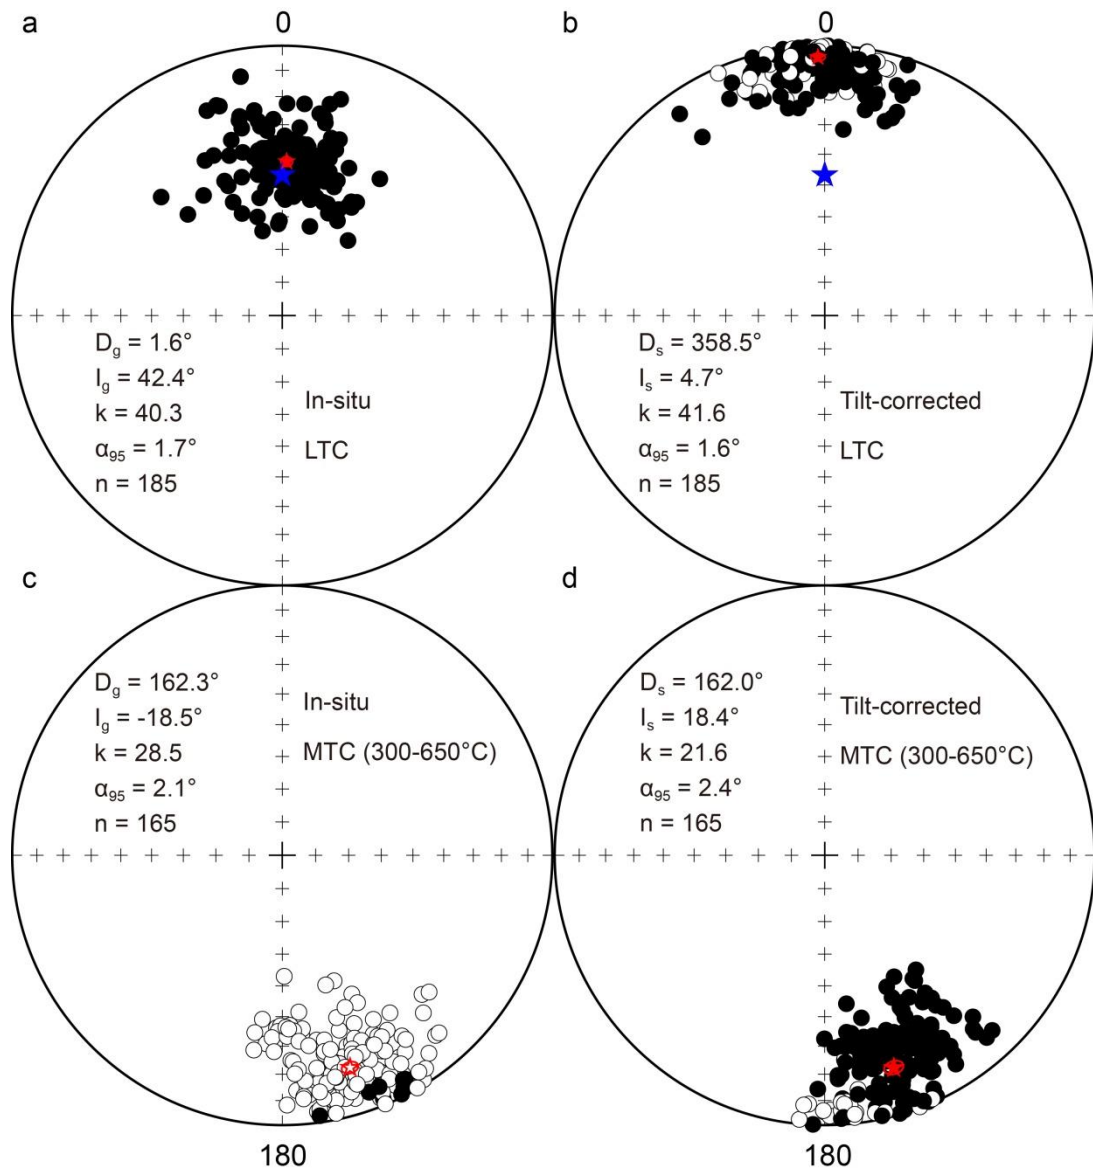

164

165

166

167

168

169

170

171

**Supplementary Figure 4.** Equal-area projections of in-situ (left) and tilt-corrected (right) paleomagnetic directions of all specimens in the Cailangba A and B sections. (a, b) LTC directions. (c, d) MTC directions. Red circles around the red stars in (a–d) denote the 95% confidence limit and mean directions. Solid and open symbols denote the lower and upper hemisphere, respectively. The blue stars in the (a, b) denote the present geomagnetic direction of the Cailangba section.

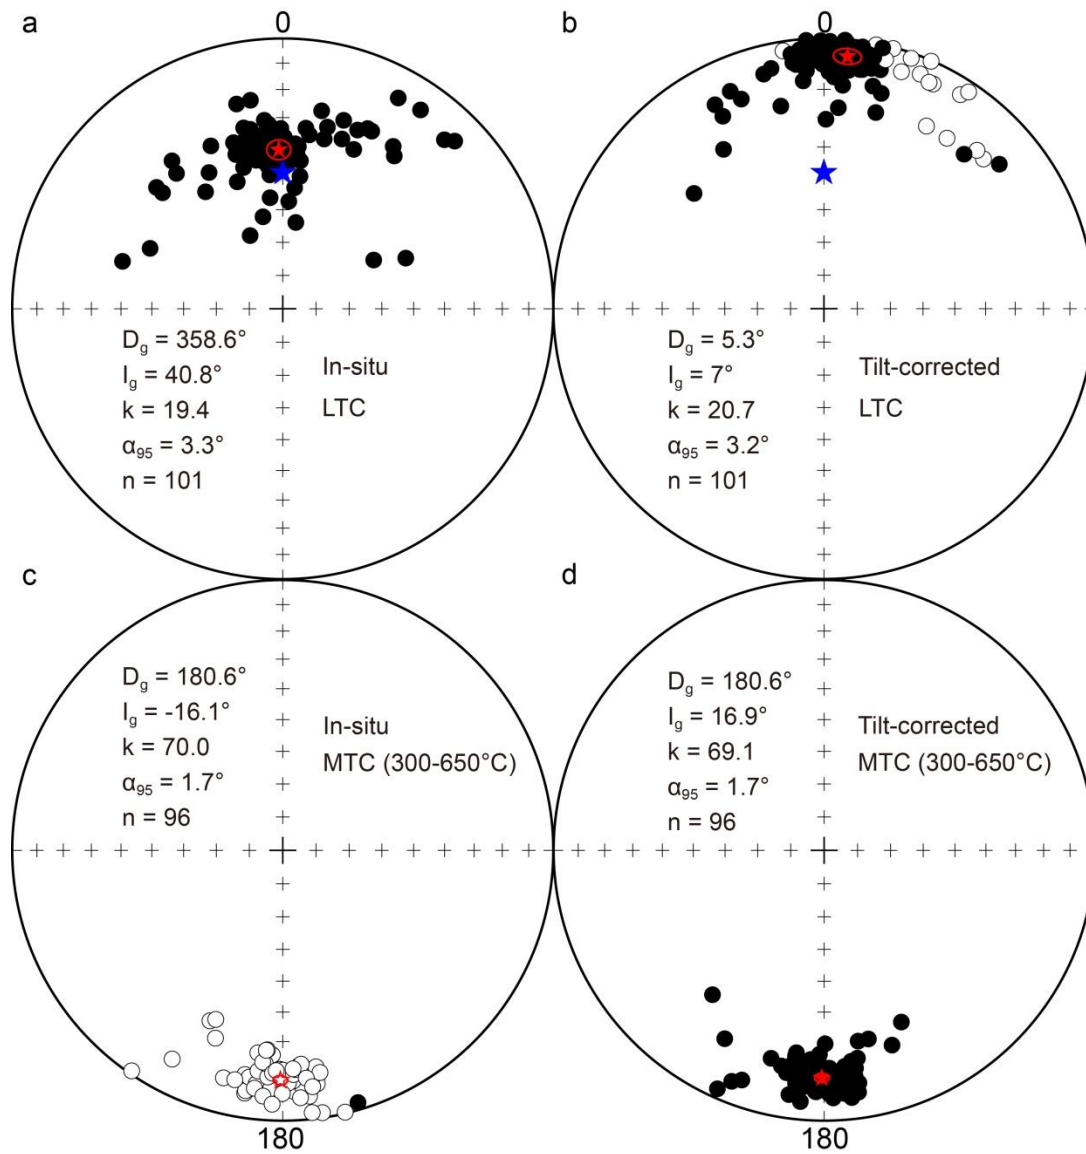

172  
173

174 **Supplementary Figure 5.** Equal-area projections of in-situ (left) and tilt-corrected  
175 (right) paleomagnetic directions of all specimens in the Sangdanlin section. (a, b)  
176 LTC directions. (c, d) MTC directions. Red circles around the red stars in (a–d)  
177 denote the 95% confidence limit and mean directions. Solid and open symbols denote  
178 the lower and upper hemisphere, respectively. The blue stars in the (a, b) denote the  
179 present geomagnetic direction of the Sangdanlin section.

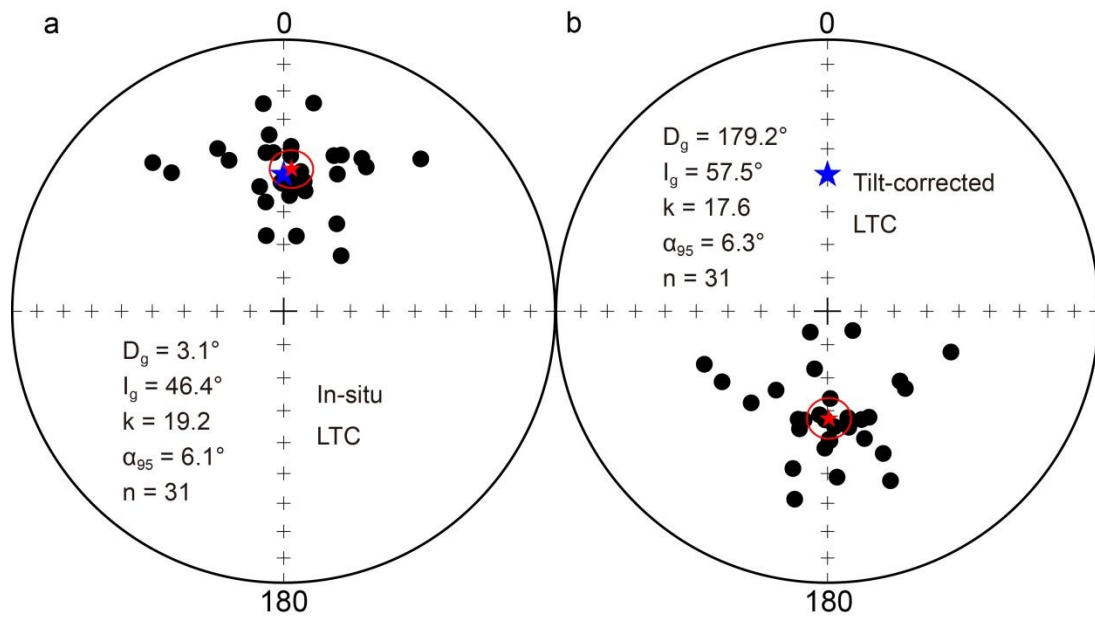

180  
181

182 **Supplementary Figure 6.** Equal-area projections of in-situ (a) and tilt-corrected (b)  
 183 LTC directions of all specimens in the Mubala section. Red circles around the red  
 184 stars in (a, b) denote the 95% confidence limit and mean directions. Solid symbols  
 185 denote the lower hemisphere. The blue stars in the (a, b) denote the present  
 186 geomagnetic direction of the Mubala section.

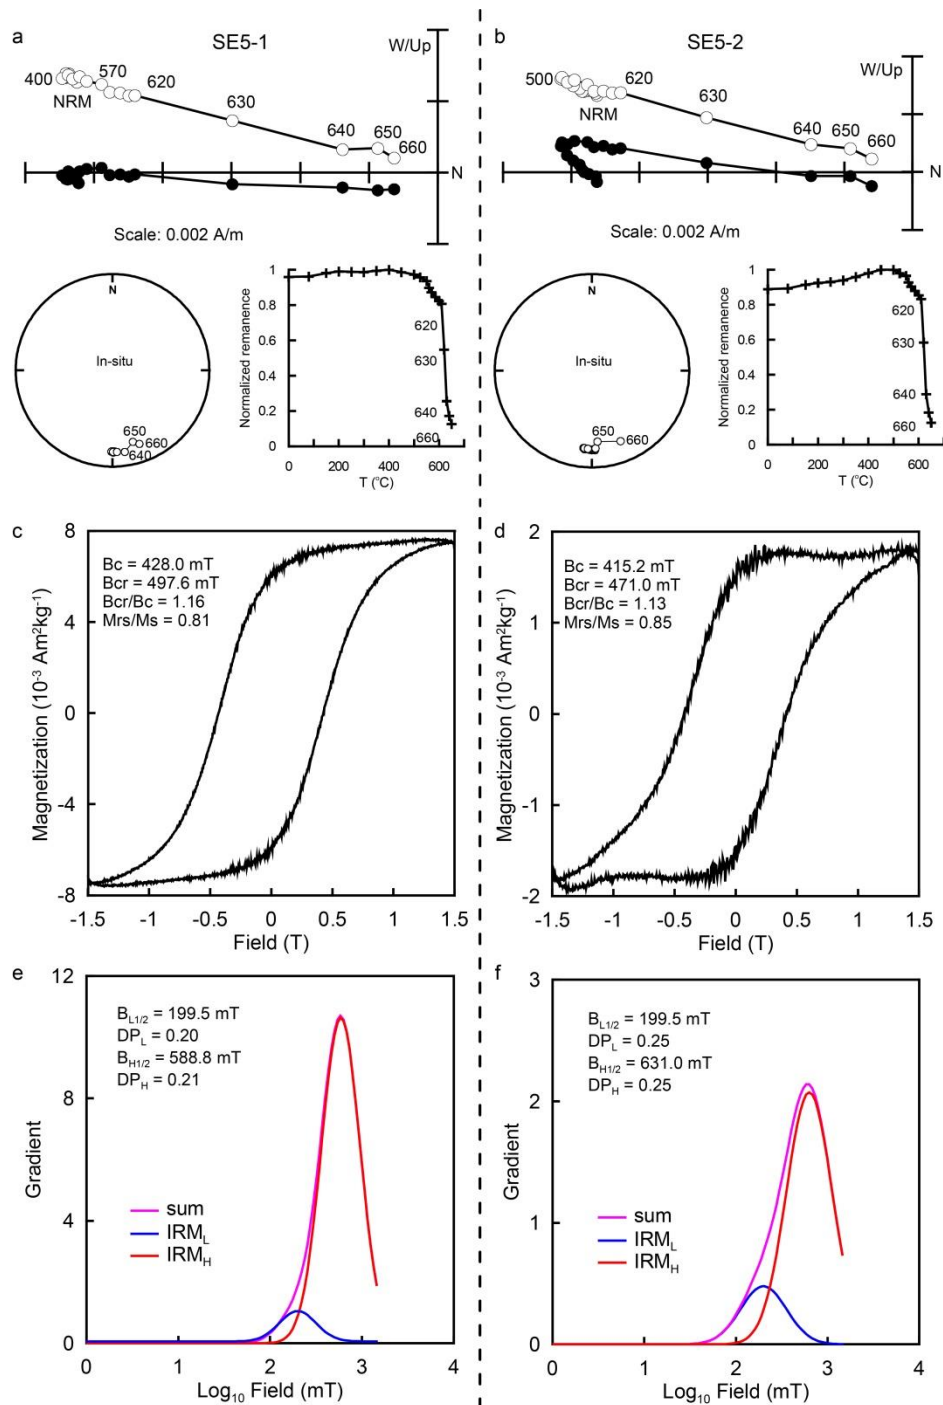

187  
188

189 **Supplementary Figure 7.** Paleomagnetic and rock magnetic results of the completely  
190 remagnetized specimens of Sangdanlin section. (a, b) Representative orthogonal  
191 demagnetization diagrams in geographic coordinates, corresponding normalized NRM  
192 vs. temperature plots, equal-area stereonet. (c, d) Hysteresis loops after high-field  
193 slope correction with hysteresis parameters indicated. (e, f) IRM component analysis,  
194 where blue, red and purple lines indicate the low ( $IRM_L$ ), high coercivity ( $IRM_H$ )  
195 components and the sum of these components (sum), respectively.

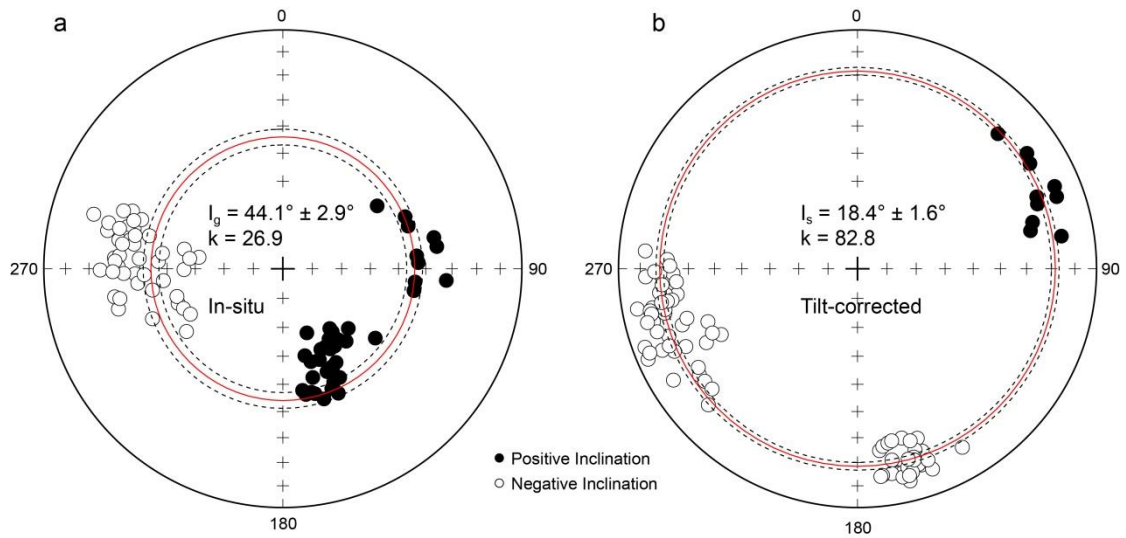

196  
 197  
 198  
 199  
 200  
 201  
 202

**Supplementary Figure 8.** Equal-area projections of sample-mean direction of HTCs for the Sangdanlin and Mubala sections. (a) Before tilt correction. (b) After tilt correction. The red circles with black dashed circles show the average inclination and error of the average inclination.

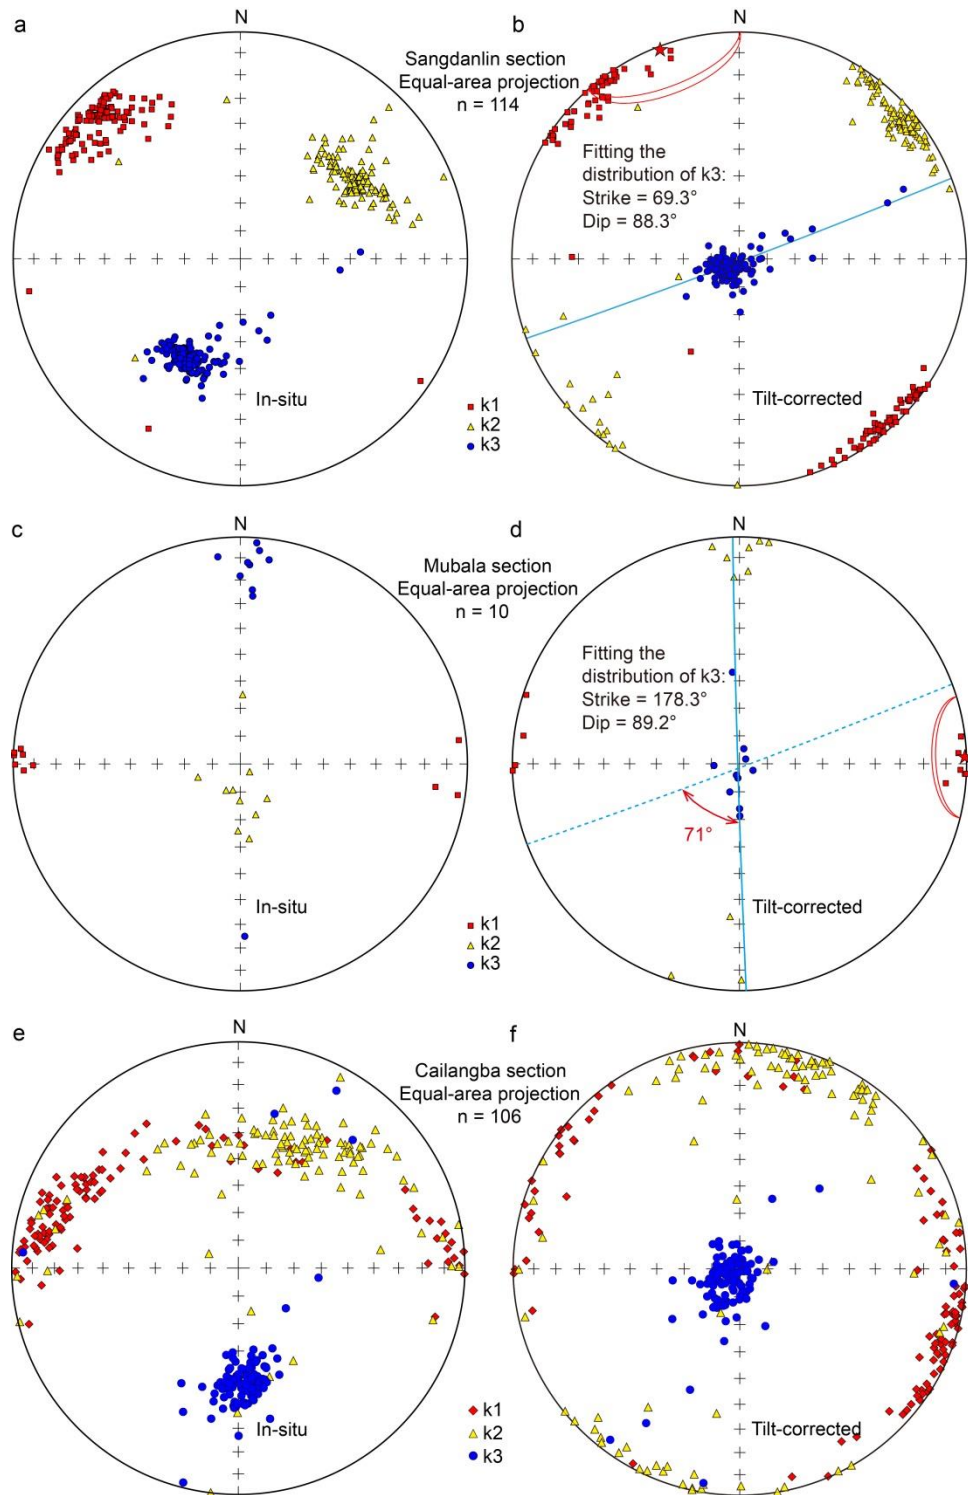

203  
 204  
 205  
 206  
 207  
 208  
 209  
 210

**Supplementary Figure 9.** Stereoplots of the AMS results of the Sangdanlin (a, b), Mubala (c, d) and Cailangba (c, d) sections in geographical (stratigraphic) coordinates. Solid symbols, individual directions. Light blue line, the plane of great-circle fitting the distribution of k3. Red star, the pole to plane of fitting the distribution of k3 with 95% confidence limit.

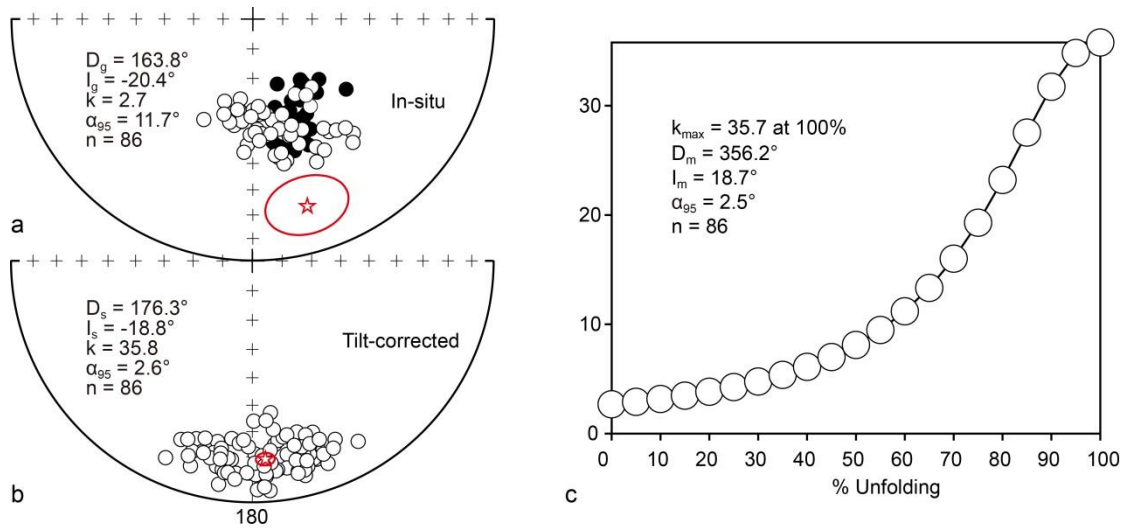

211

212

213 **Supplementary Figure 10.** Equal-area projections of in-situ (a) and tilt-corrected (b)

214 paleomagnetic directions and progressive unfolding of the mean direction (c) of

215 Sangdanlin section after rotated  $71^\circ$  counterclockwise and of Mubala section. Red

216 circles around the red stars in (a, b) denote the 95% confidence limit and mean

217 directions. Solid and open symbols in (a, b) denote the lower and upper hemisphere,

218 respectively.



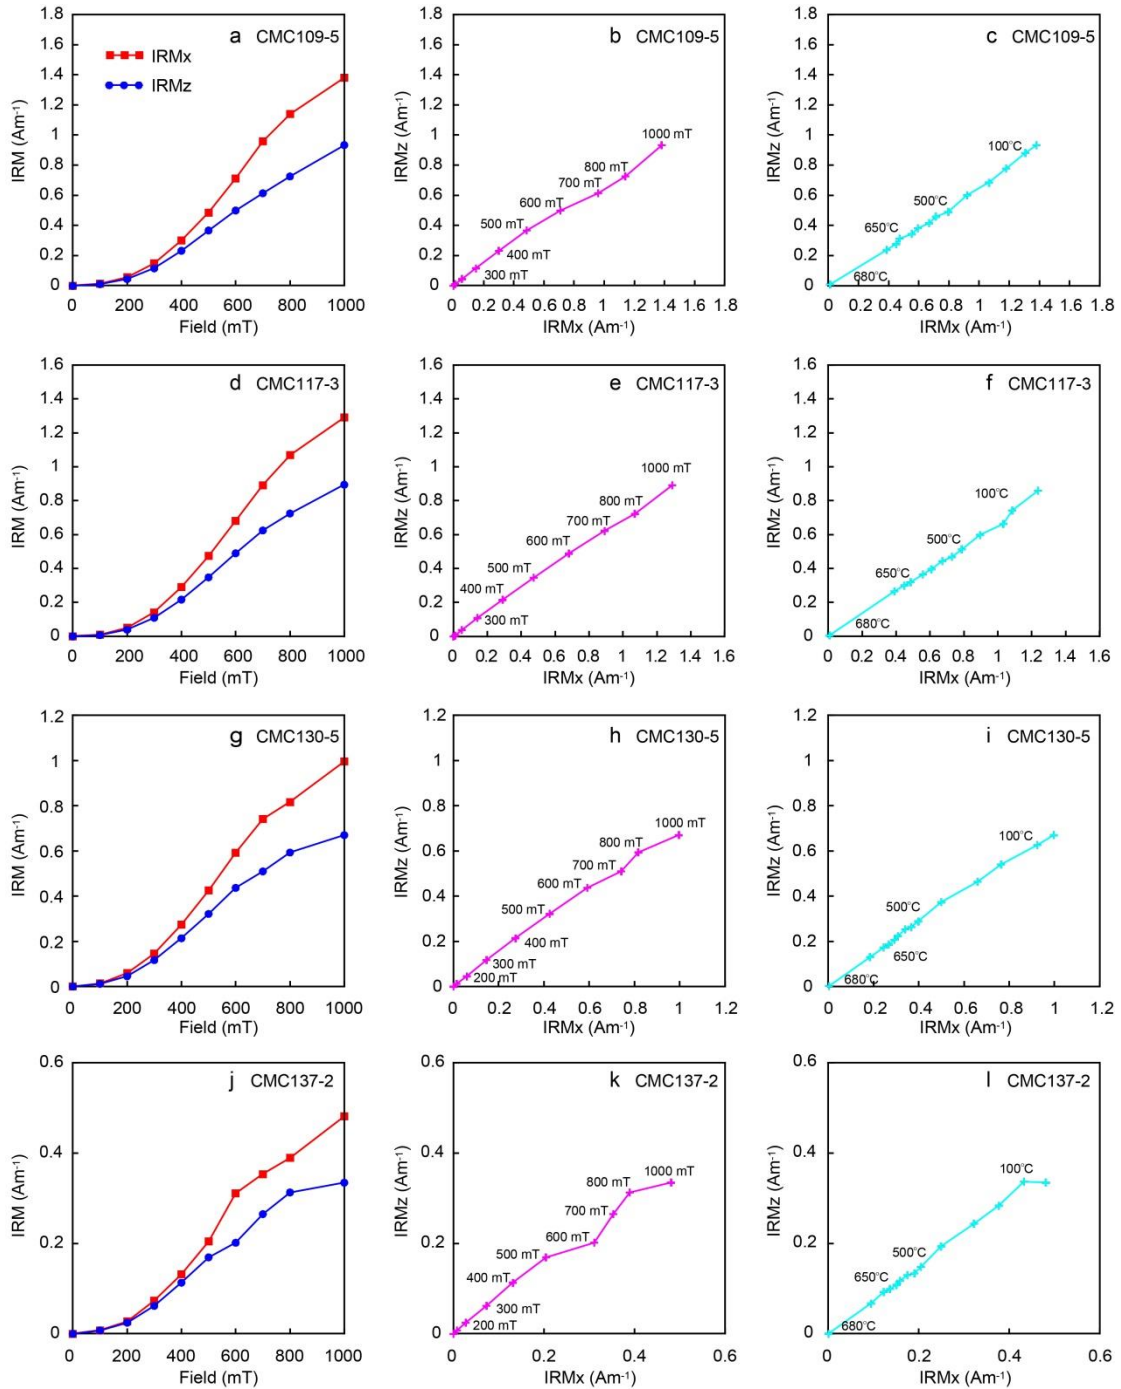

219  
220

221 **Supplementary Figure 11.** The anisotropy-based inclination shallowing correction  
 222 for the CORBs of the Cailangba section. (a, d, g and j) The IRMx (parallel to  
 223 bedding) and IRMz (perpendicular to bedding) acquisitions produced by applying a  
 224 magnetic field at an angle of 45 ° to the bedding as a function of increasing field. (b, e,  
 225 h and k) The slope (IRMz/IRMx) of the least-squares-fit for the data points between  
 226 200 mT and 1000 mT. (c, f, i and l) The slope of the thermal demagnetization of  
 227 IRMz and IRMx, respectively.

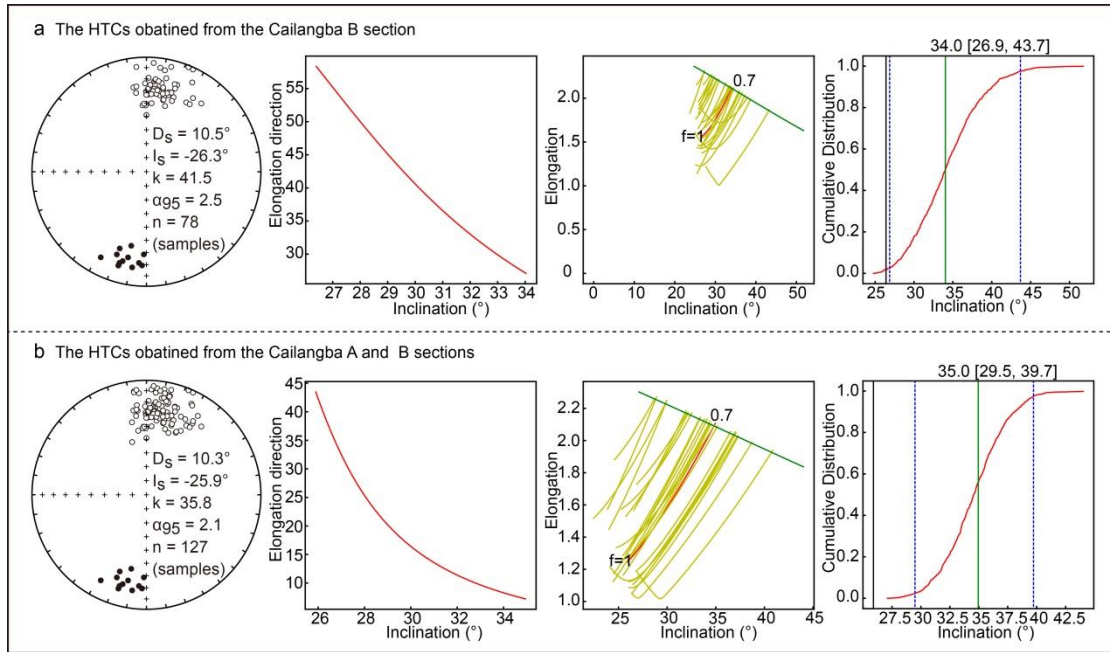

228  
 229  
 230  
 231  
 232  
 233  
 234  
 235

**Supplementary Figure 12.** The E/I inclination shallowing correction. (a) The data from the Cailangba B section. (b) The data from the Cailangba A and B sections. From left to right in (a, b) are the equal-area projections of samples directions, elongation direction of the curve with respect to inclination, elongation/inclination as a function and cumulative distribution of the corrected inclination.

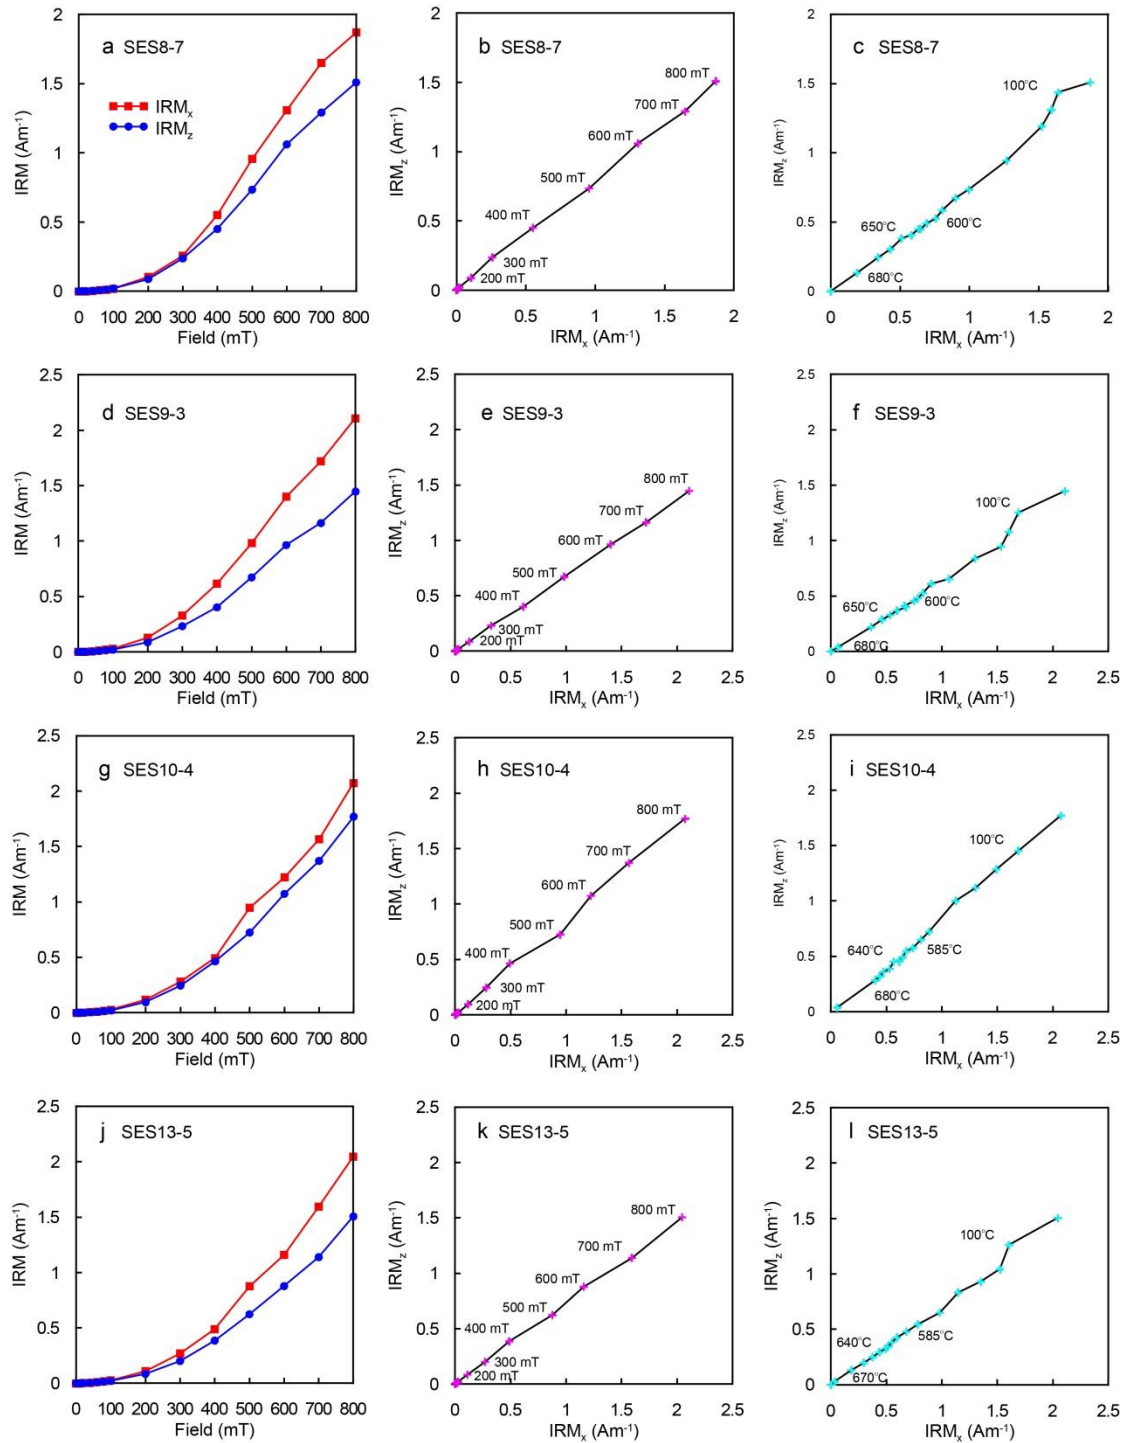

238  
239

240 **Supplementary Figure 13.** The inclination shallowing correction for the Sangdanlin  
 241 red siliceous shales. (a, d, g and j) The IRM<sub>x</sub> (parallel to bedding) and IRM<sub>z</sub>  
 242 (perpendicular to bedding) acquisitions produced by applying a magnetic field at an  
 243 angle of 45 ° to the bedding as a function of increasing field. (b, e, h and k) The slope  
 244 (IRM<sub>z</sub>/IRM<sub>x</sub>) of the least-squares-fit for the data points between 200 mT and 800 mT.  
 245 (c, f, i and l) The slope of the thermal demagnetization of IRM<sub>z</sub> and IRM<sub>x</sub>,  
 246 respectively.

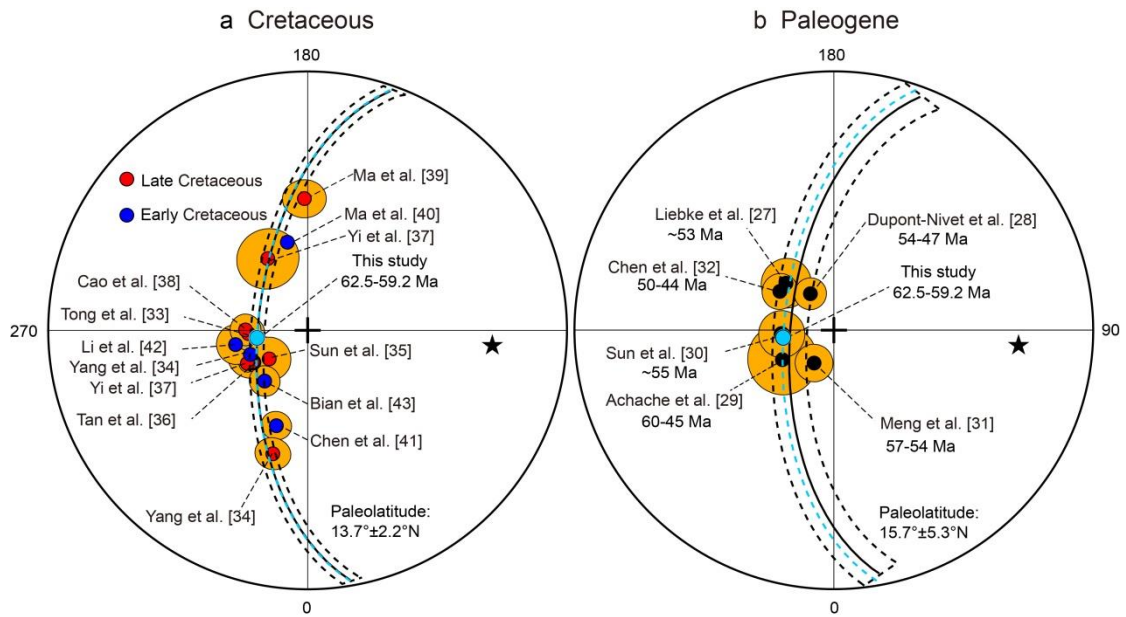

247

248

249 **Supplementary Figure 14.** Paleopoles of Cretaceous and Paleogene for the Lhasa  
 250 terrane. (a) Equal-area projections showing the distribution of Cretaceous paleopoles.  
 251 Small-circle fitting passes through 13 selected Cretaceous poles, and gives a  
 252 paleolatitude of  $13.7^{\circ} \pm 2.2^{\circ} \text{N}$ . (b) Equal-area projection of the Paleogene paleopoles.  
 253 Small-circle fitting passes through 6 selected Paleogene poles, indicating a  
 254 paleolatitude of  $15.7^{\circ} \pm 5.3^{\circ} \text{N}$ . See Supplementary Table 4 for values and sources.  
 255 The black star indicates the sampling location, which was selected as the reference  
 256 point ( $29.3^{\circ} \text{N}$ ,  $85.3^{\circ} \text{E}$ ) when calculating the paleolatitude of the Lhasa terrane in this  
 257 study.

258

259  
260

**Supplementary Table 1.** High-temperature component directions of all specimens in the Sangdanlin, Mubala, Cailangba A and B sections.

| Sample ID                              | Bedding<br>Strike/dip | Depth<br>(m) | D <sub>g</sub><br>(°) | I <sub>g</sub><br>(°) | D <sub>s</sub><br>(°) | I <sub>s</sub><br>(°) | MAD<br>(°) | Demag |
|----------------------------------------|-----------------------|--------------|-----------------------|-----------------------|-----------------------|-----------------------|------------|-------|
| <b>Sangdanlin section (650-680 °C)</b> |                       |              |                       |                       |                       |                       |            |       |
| SE6-1                                  | 297/34                | 113.2        | 99.5                  | 43.7                  | 77.6                  | 26.8                  | 9.4        | Th    |
| SE6-2                                  | 297/34                | 113.3        | 95.7                  | 43.7                  | 75.1                  | 25.2                  | 2.2        | Th    |
| SE6-3                                  | 297/34                | 113.4        | 94.1                  | 32                    | 80.9                  | 14.7                  | 7.5        | Th    |
| SE6-4                                  | 297/34                | 113.5        | 56.3                  | 50.8                  | 46.1                  | 19.6                  | 3.4        | Th    |
| SE6-5                                  | 297/34                | 113.6        | 87.4                  | 42.7                  | 70.2                  | 21.1                  | 5.1        | Th    |
| SE6-6                                  | 297/34                | 113.7        | 78.3                  | 35.7                  | 67.3                  | 11.6                  | 8          | Th    |
| SE6-7                                  | 297/34                | 113.8        | 71.2                  | 43.9                  | 58.6                  | 16.6                  | 2.9        | Th    |
| SE6-8                                  | 297/34                | 113.9        | 66.9                  | 43.7                  | 55.7                  | 15.3                  | 3          | Th    |
| SE6-9                                  | 297/34                | 114          | 81.8                  | 35.2                  | 70.1                  | 12.4                  | 5.5        | Th    |
| SE6-10                                 | 297/34                | 114.1        | 84.5                  | 43.1                  | 68.1                  | 20.3                  | 19.3       | Th    |
| SE8-1                                  | 300/36                | 115.2        | 285.1                 | -35.8                 | 266.8                 | -20.5                 | 5.2        | Th    |
| SE8-2                                  | 300/36                | 115.3        | 291                   | -33.1                 | 272.8                 | -21.4                 | 18.3       | Th    |
| SE8-3                                  | 300/36                | 115.4        | 269.5                 | -56                   | 243.9                 | -30.3                 | 9.1        | Th    |
| SE8-4                                  | 300/36                | 115.5        | 251.7                 | -51.9                 | 236.1                 | -21.4                 | 6.2        | Th    |
| SE8-5                                  | 300/36                | 115.6        | 255.3                 | -52.2                 | 238.2                 | -22.7                 | 6.1        | Th    |
| SE8-7                                  | 300/36                | 115.8        | 264.3                 | -48.4                 | 245.6                 | -22.2                 | 5.8        | Th    |
| SE9-2                                  | 300/36                | 117.8        | 236.9                 | -50.2                 | 227.6                 | -16.6                 | 8.2        | Th    |
| SE9-7                                  | 300/36                | 118.3        | 249                   | -41.2                 | 238.8                 | -10.9                 | 0.4        | Th    |
| SE9-8                                  | 300/36                | 118.4        | 289.2                 | -37.5                 | 268.5                 | -23.8                 | 2.9        | Th    |
| SE9-10                                 | 300/36                | 118.6        | 274                   | -39.6                 | 257                   | -18.4                 | 3.4        | Th    |
| SE9-11                                 | 300/36                | 118.7        | 273.3                 | -46.7                 | 252.2                 | -24                   | 3.6        | Th    |
| SE9-12                                 | 300/36                | 118.8        | 277.3                 | -47.9                 | 253.8                 | -26.6                 | 4.3        | Th    |
| SE9-13                                 | 300/36                | 118.9        | 283.9                 | -42                   | 261.9                 | -24.8                 | 11.2       | Th    |
| SE9-14                                 | 300/36                | 119          | 285.1                 | -33.1                 | 268.5                 | -18.4                 | 13.9       | Th    |
| SE9-19                                 | 300/36                | 119.5        | 248.2                 | -53.1                 | 233.6                 | -21.7                 | 2.1        | Th    |
| SE10-2                                 | 300/36                | 121.8        | 243.8                 | -54.5                 | 230.4                 | -22.1                 | 4.8        | Th    |
| SE10-3                                 | 300/36                | 121.9        | 281.3                 | -55.4                 | 250.5                 | -34                   | 9.3        | Th    |
| SE10-4                                 | 300/36                | 122          | 260.7                 | -44                   | 245.7                 | -17.1                 | 4.4        | Th    |
| SE10-6                                 | 300/36                | 122.2        | 277.8                 | -61                   | 244.2                 | -36.8                 | 8.7        | Th    |
| SE10-9                                 | 300/36                | 122.5        | 276.3                 | -57.8                 | 246.1                 | -34                   | 10.2       | Th    |
| SE11-1                                 | 291/38                | 124.7        | 268                   | -38.1                 | 250.3                 | -17.3                 | 3.2        | Th    |
| SE11-2                                 | 291/38                | 124.8        | 290                   | -29.8                 | 270.9                 | -22.5                 | 2.4        | Th    |
| SE11-4                                 | 291/38                | 125          | 281.1                 | -33.2                 | 262.4                 | -20.1                 | 3.6        | Th    |
| SE11-5                                 | 291/38                | 125.1        | 287.9                 | -34.8                 | 265.9                 | -25                   | 3.7        | Th    |
| SE11-6                                 | 291/38                | 125.2        | 269.6                 | -24.6                 | 259.6                 | -7.1                  | 2.4        | Th    |
| SE11-7                                 | 291/38                | 125.3        | 280                   | -31                   | 263.1                 | -17.7                 | 3.5        | Th    |
| SE11-8                                 | 291/38                | 125.4        | 281.3                 | -36.2                 | 260.4                 | -22.4                 | 2.7        | Th    |
| SE11-9                                 | 291/38                | 125.5        | 256.2                 | -29.9                 | 246.6                 | -5.1                  | 14.9       | Th    |
| SE11-10                                | 291/38                | 125.6        | 273.7                 | -30.1                 | 259.2                 | -13.7                 | 5.4        | Th    |
| SE12-1                                 | 293/42                | 126.7        | 264.3                 | -38.9                 | 247.3                 | -12.5                 | 3.5        | Th    |
| SE12-2                                 | 293/42                | 126.8        | 267.5                 | -41.5                 | 247.7                 | -16                   | 2.5        | Th    |
| SE12-3                                 | 293/42                | 126.9        | 280.7                 | -35.3                 | 260.1                 | -18.3                 | 2.4        | Th    |
| SE12-4                                 | 293/42                | 127          | 279.4                 | -37                   | 258                   | -18.8                 | 2.7        | Th    |
| SE12-5                                 | 293/42                | 127.1        | 282.7                 | -36.8                 | 260.3                 | -20.4                 | 2.1        | Th    |
| SE12-6                                 | 293/42                | 127.2        | 282.3                 | -25.9                 | 267.8                 | -12.3                 | 11.2       | Th    |

|                                         |        |       |       |       |       |       |     |    |
|-----------------------------------------|--------|-------|-------|-------|-------|-------|-----|----|
| SE12-8                                  | 293/42 | 127.4 | 274.6 | -32   | 258.5 | -12.5 | 3.2 | Th |
| SE13-1                                  | 290/40 | 127.7 | 260.5 | -29.4 | 249.7 | -5.8  | 2.9 | Th |
| SE13-2                                  | 290/40 | 127.8 | 270.7 | -31.7 | 255.4 | -12.8 | 3.1 | Th |
| SE13-3                                  | 290/40 | 127.9 | 272.6 | -30.4 | 257.6 | -12.8 | 3.7 | Th |
| SE13-4                                  | 290/40 | 128   | 268.3 | -33.8 | 252.5 | -13.2 | 1.3 | Th |
| SE13-6                                  | 290/40 | 128.2 | 269   | -29.6 | 255.6 | -10.2 | 1.1 | Th |
| SE13-7                                  | 290/40 | 128.3 | 286.1 | -18.8 | 274.8 | -11.9 | 4   | Th |
| SE13-8                                  | 290/40 | 128.4 | 284.8 | -25.6 | 269.2 | -16.2 | 2.1 | Th |
| SE13-9                                  | 290/40 | 128.5 | 278.8 | -32.6 | 260.2 | -17.9 | 1.7 | Th |
| SE13-10                                 | 290/40 | 128.6 | 283.9 | -30.3 | 265.3 | -19.1 | 5.8 | Th |
| SE13-11                                 | 290/40 | 128.7 | 259.6 | -31.3 | 247.9 | -6.9  | 2.6 | Th |
| <b>Mubala section (600-680 °C)</b>      |        |       |       |       |       |       |     |    |
| MB1-4                                   | 90/72  | -     | 170.8 | 47.2  | 173.1 | -24.3 | 7.7 | Th |
| MB1-5                                   | 90/72  | -     | 164.6 | 51    | 169.8 | -19.7 | 5.4 | Th |
| MB1-6                                   | 90/72  | -     | 162.5 | 42.3  | 165.4 | -27.6 | 3.1 | Th |
| MB1-7                                   | 90/72  | -     | 169.6 | 45.5  | 171.9 | -25.8 | 10  | Th |
| MB2-1                                   | 90/72  | -     | 152.1 | 59.4  | 166.1 | -9.3  | 7.7 | Th |
| MB2-2                                   | 90/72  | -     | 152.4 | 47.4  | 160.5 | -20.1 | 7.2 | Th |
| MB2-3                                   | 90/72  | -     | 156   | 42.4  | 160.6 | -25.7 | 6.4 | Th |
| MB2-4                                   | 90/72  | -     | 153.9 | 51.6  | 163.4 | -16.7 | 7.7 | Th |
| MB2-5                                   | 90/72  | -     | 155.8 | 46.9  | 162.4 | -21.5 | 4.6 | Th |
| MB2-6                                   | 90/72  | -     | 158.1 | 56.3  | 167.7 | -13.4 | 7   | Th |
| MB2-7                                   | 90/72  | -     | 156.8 | 51.3  | 165   | -17.8 | 6.4 | Th |
| MB2-8                                   | 90/72  | -     | 163.2 | 56.6  | 170.5 | -14.1 | 8   | Th |
| MB2-9                                   | 90/72  | -     | 150.4 | 52.8  | 162   | -14.7 | 4   | Th |
| MB3-1                                   | 91/74  | -     | 153.9 | 51.1  | 163.4 | -18.8 | 3.3 | Th |
| MB3-2                                   | 91/74  | -     | 157.8 | 44.9  | 163   | -25.6 | 6.8 | Th |
| MB3-3                                   | 91/74  | -     | 154.8 | 59.4  | 167.7 | -11.7 | 2.6 | Th |
| MB3-4                                   | 91/74  | -     | 165.8 | 59.2  | 173.1 | -13.9 | 3.4 | Th |
| MB3-6                                   | 91/74  | -     | 167   | 45.9  | 170.1 | -26.8 | 3.5 | Th |
| MB3-7                                   | 91/74  | -     | 165.6 | 45.1  | 168.8 | -27.4 | 1.3 | Th |
| MB3-9                                   | 91/74  | -     | 153.3 | 52.1  | 163.6 | -17.7 | 1.4 | Th |
| MB4-1                                   | 93/82  | -     | 146.7 | 61.2  | 165.8 | -15.3 | 7.2 | Th |
| MB4-2                                   | 93/82  | -     | 142.2 | 59.2  | 162.7 | -15.3 | 4.9 | Th |
| MB4-3                                   | 93/82  | -     | 132.4 | 59.6  | 159.5 | -11.4 | 3   | Th |
| MB4-4                                   | 93/82  | -     | 142   | 62.5  | 164.9 | -12.8 | 3.2 | Th |
| MB4-5                                   | 93/82  | -     | 138.9 | 56.9  | 159.8 | -15.8 | 2.5 | Th |
| MB4-8                                   | 93/82  | -     | 126.9 | 50    | 149.6 | -14.4 | 2.7 | Th |
| MB4-9                                   | 93/82  | -     | 159.5 | 66.6  | 173.6 | -13.5 | 2.4 | Th |
| MB4-10                                  | 93/82  | -     | 141.9 | 64    | 165.9 | -11.7 | 2.8 | Th |
| MB4-11                                  | 93/82  | -     | 146.2 | 58    | 163.5 | -17.6 | 2.5 | Th |
| MB4-12                                  | 93/82  | -     | 149.5 | 58    | 165.1 | -18.6 | 2.1 | Th |
| <b>Cailangba A section (650-680 °C)</b> |        |       |       |       |       |       |     |    |
| CL025                                   | 261/33 | 5.4   | 349.2 | -2.7  | 348.7 | -35.7 | 0.8 | Th |
| CL026                                   | 261/33 | 5.5   | 353.7 | 10.6  | 353.9 | -22.4 | 2.5 | Th |
| CL027                                   | 261/33 | 5.6   | 14.1  | -6    | 19.7  | -35.9 | 1.8 | Th |
| CL028                                   | 261/33 | 5.9   | 346.9 | -17.8 | 344.8 | -50.6 | 1   | Th |
| CL029-1                                 | 261/33 | 6     | 11.4  | 14.4  | 11.6  | -16.6 | 7.6 | Th |
| CL029-2                                 | 261/33 | 6     | 12.1  | 11.2  | 13.1  | -19.6 | 4.7 | Th |

|                                         |        |      |       |      |       |       |     |    |
|-----------------------------------------|--------|------|-------|------|-------|-------|-----|----|
| CL032-1                                 | 261/33 | 6.7  | 352.2 | -10  | 352.7 | -43   | 2.4 | Th |
| CL033-1                                 | 261/33 | 7    | 353.1 | 22.9 | 353   | -10.1 | 1   | Th |
| CL033-2                                 | 261/33 | 7    | 353.1 | 22.2 | 353   | -10.8 | 0.9 | Th |
| CL034                                   | 261/33 | 7.1  | 0.1   | 4.6  | 1.3   | -27.9 | 2.2 | Th |
| CL040-1                                 | 268/36 | 8.5  | 31.7  | 11.1 | 33.1  | -18.9 | 4.9 | Th |
| CL040-2                                 | 268/36 | 8.5  | 27.4  | 19.4 | 26.3  | -12.4 | 4.1 | Th |
| CL041-1                                 | 268/36 | 8.7  | 18.7  | -6.7 | 25.2  | -39.8 | 3.4 | Th |
| CL041-2                                 | 268/36 | 8.7  | 13.9  | -7.8 | 19.5  | -42.1 | 2.5 | Th |
| CL042                                   | 268/36 | 8.8  | 25.3  | 1    | 30.2  | -30.6 | 2.3 | Th |
| CL043-1                                 | 268/36 | 8.9  | 28.8  | 3.8  | 32.9  | -26.7 | 2.2 | Th |
| CL043-2                                 | 268/36 | 8.9  | 23.9  | 5.4  | 27.2  | -26.7 | 1.8 | Th |
| CL044-1                                 | 268/36 | 9    | 21.9  | -4.4 | 28.2  | -36.7 | 3.1 | Th |
| CL044-2                                 | 268/36 | 9    | 19    | -5.9 | 25.3  | -38.9 | 5.5 | Th |
| CL046                                   | 268/36 | 9.2  | 5.5   | 28   | 4.7   | -7.7  | 1.5 | Th |
| CL047-1                                 | 268/36 | 9.6  | 11.1  | 3.8  | 13.3  | -31.2 | 2.3 | Th |
| CL047-2                                 | 268/36 | 9.6  | 4.7   | 8.8  | 5.4   | -26.9 | 1.7 | Th |
| CL048-1                                 | 269/40 | 9.8  | 10.4  | 7.5  | 12.3  | -31.6 | 2.9 | Th |
| CL048-2                                 | 269/40 | 9.8  | 8.2   | 10.3 | 9.4   | -29.2 | 4.1 | Th |
| CL049-1                                 | 269/40 | 9.9  | 359.9 | 7.7  | 0.1   | -32.3 | 2.5 | Th |
| CL049-2                                 | 269/40 | 9.9  | 359.4 | 11.1 | 359.5 | -28.9 | 4.2 | Th |
| CL050-1                                 | 269/40 | 10.2 | 1.7   | 8.7  | 2.1   | -31.3 | 1.7 | Th |
| CL050-2                                 | 269/40 | 10.2 | 6.2   | 4.8  | 7.7   | -34.9 | 2.3 | Th |
| CL051-1                                 | 269/40 | 10.4 | 9.7   | 9.1  | 11.2  | -30.1 | 2.4 | Th |
| CL051-2                                 | 269/40 | 10.4 | 6.3   | 12.5 | 7.1   | -27.2 | 2.8 | Th |
| CL052                                   | 269/40 | 10.5 | 357.9 | -0.2 | 357.6 | -40.2 | 4.9 | Th |
| CL053                                   | 269/40 | 10.8 | 354.4 | 12.9 | 354   | -27   | 2.8 | Th |
| CL054                                   | 269/40 | 11   | 8.4   | 17.2 | 8.7   | -22.3 | 3.2 | Th |
| CL055                                   | 258/39 | 11.2 | 6.3   | 8.4  | 8.7   | -28.6 | 5.7 | Th |
| CL056-1                                 | 258/39 | 11.6 | 15.1  | 23.1 | 13.4  | -12.2 | 2.9 | Th |
| CL056-2                                 | 258/39 | 11.6 | 6.7   | 25.7 | 5.2   | -11.5 | 2.4 | Th |
| CL057                                   | 258/39 | 11.8 | 356.5 | 26.5 | 355.8 | -12.1 | 1   | Th |
| CL058                                   | 258/39 | 12   | 19.8  | 6.5  | 23.8  | -26.3 | 4   | Th |
| CL059                                   | 258/39 | 12.1 | 8.4   | 29.7 | 5.8   | -7.3  | 1.1 | Th |
| CL060-1                                 | 258/39 | 12.2 | 13.6  | 23.7 | 11.9  | -11.9 | 3.1 | Th |
| CL060-2                                 | 258/39 | 12.2 | 12.7  | 28.9 | 9.7   | -7.2  | 1.5 | Th |
| CL061                                   | 258/39 | 12.6 | 4.7   | 29   | 2.7   | -8.7  | 1.5 | Th |
| CL062                                   | 258/39 | 13   | 9.6   | 20.8 | 9     | -15.7 | 1.3 | Th |
| CL063-1                                 | 258/39 | 13.3 | 16.8  | 14.1 | 17.9  | -20.2 | 2.4 | Th |
| CL064                                   | 258/39 | 13.4 | 12.1  | 6    | 15.7  | -29.3 | 2.5 | Th |
| CL065-1                                 | 258/39 | 13.5 | 14.7  | 22.5 | 13.2  | -12.9 | 1.6 | Th |
| CL065-2                                 | 258/39 | 13.5 | 11    | 21.1 | 10.2  | -15.1 | 3.3 | Th |
| CL065-3                                 | 258/39 | 13.5 | 13.3  | 17.4 | 13.4  | -18.2 | 1.5 | Th |
| CL067                                   | 258/39 | 14.2 | 11.4  | 9    | 14.1  | -26.7 | 2.7 | Th |
| <b>Cailangba B section (650-680 °C)</b> |        |      |       |      |       |       |     |    |
| CM096-2                                 | 258/44 | 5.1  | 351   | 17.5 | 351.2 | -26.4 | 0.9 | Th |
| CM097-1                                 | 258/44 | 5.2  | 357.1 | 2.9  | 0     | -40.5 | 0.6 | Th |
| CM097-2                                 | 258/44 | 5.2  | 358.7 | 19.5 | 359.1 | -23.8 | 5.3 | Th |
| CM098-1                                 | 258/44 | 5.3  | 358.3 | 12.5 | 359.7 | -30.7 | 9.4 | Th |
| CM098-2                                 | 258/44 | 5.3  | 1.8   | 17.7 | 2.5   | -25   | 2.7 | Th |
| CM099-1                                 | 258/44 | 5.8  | 1.9   | 11.1 | 5     | -29   | 3   | Th |

|         |        |      |       |      |       |       |     |    |
|---------|--------|------|-------|------|-------|-------|-----|----|
| CM099-2 | 258/44 | 5.8  | 4.9   | 13.1 | 6.9   | -29   | 4.1 | Th |
| CM099-3 | 258/44 | 5.8  | 3.8   | 14.3 | 5.4   | -28   | 3.7 | Th |
| CM099-4 | 258/44 | 5.8  | 4.1   | 10.2 | 6.7   | -31.9 | 3.6 | Th |
| CM101-2 | 258/38 | 6.4  | 352.9 | 11.8 | 353.3 | -26   | 4.5 | Th |
| CM102   | 258/38 | 7.4  | 11.8  | 3.4  | 16    | -31.1 | 2.6 | Th |
| CM103-1 | 258/38 | 7.5  | 23    | -0.6 | 29.9  | -30.9 | 2   | Th |
| CM103-2 | 258/38 | 7.5  | 18    | 12.2 | 19.5  | -20.7 | 5.1 | Th |
| CM104-1 | 258/38 | 7.7  | 32.9  | 1.6  | 38.8  | -24.5 | 7.2 | Th |
| CM104-2 | 258/38 | 7.7  | 27.8  | 16.3 | 27.2  | -13.4 | 2.5 | Th |
| CM105-1 | 258/38 | 8.1  | 6.1   | 3.2  | 9.7   | -32.7 | 2.2 | Th |
| CM105-2 | 258/38 | 8.1  | 4.8   | 6    | 7.4   | -30.2 | 1.8 | Th |
| CM106-2 | 258/38 | 8.2  | 16.5  | 27.6 | 13.3  | -6.6  | 8.5 | Th |
| CM108-1 | 258/38 | 8.5  | 8.9   | 1.9  | 13.3  | -33.2 | 2.7 | Th |
| CM108-2 | 258/38 | 8.5  | 7.1   | 8.8  | 9.3   | -27   | 1.4 | Th |
| CM109-1 | 258/38 | 8.7  | 356.5 | -4.2 | 359.3 | -41.6 | 1.8 | Th |
| CM109-2 | 258/38 | 8.7  | 354.5 | -3.7 | 356.7 | -41.4 | 2.1 | Th |
| CM110   | 258/38 | 8.9  | 355.3 | 28.8 | 354.5 | -8.9  | 8.6 | Th |
| CM111-2 | 258/38 | 9    | 27.7  | 29.1 | 21.9  | -1.8  | 7.8 | Th |
| CM112-2 | 258/38 | 9.1  | 30.1  | 27.8 | 24.5  | -2.1  | 3.7 | Th |
| CM113-2 | 258/38 | 9.2  | 358.9 | 4.2  | 1     | -33   | 2.4 | Th |
| CM117-1 | 263/43 | 10.1 | 356.9 | 2.6  | 358.1 | -40.3 | 1.6 | Th |
| CM117-2 | 263/43 | 10.1 | 357.6 | -6.2 | 360   | -49   | 1.1 | Th |
| CM118   | 263/43 | 10.5 | 26.5  | 4.6  | 32.7  | -30.6 | 2.4 | Th |
| CM119-1 | 263/43 | 10.8 | 17.5  | 18.5 | 17.9  | -20.8 | 2.2 | Th |
| CM119-2 | 263/43 | 10.8 | 17.4  | 15.1 | 19    | -24.2 | 2.2 | Th |
| CM120-1 | 263/43 | 11   | 4.7   | 20.3 | 4.9   | -21.8 | 3.1 | Th |
| CM120-2 | 263/43 | 11   | 6.5   | 14.1 | 7.8   | -27.7 | 2.4 | Th |
| CM121-1 | 263/43 | 11.2 | 1.7   | 2.7  | 4.3   | -39.8 | 2.5 | Th |
| CM121-2 | 263/43 | 11.2 | 3.4   | 12.3 | 4.8   | -30   | 4   | Th |
| CM122-1 | 263/43 | 11.5 | 10.3  | 0.5  | 15.8  | -40.1 | 3.6 | Th |
| CM122-2 | 263/43 | 11.5 | 9.2   | 5.1  | 13.1  | -36   | 3.5 | Th |
| CM123-1 | 263/43 | 12   | 14.9  | 11.3 | 17.6  | -28.4 | 2.8 | Th |
| CM123-2 | 263/43 | 12   | 16    | 7.9  | 20    | -31.4 | 3   | Th |
| CM124-1 | 262/39 | 12.4 | 7.7   | 8.1  | 10    | -29.3 | 1.5 | Th |
| CM124-2 | 262/39 | 12.4 | 358.6 | 5.4  | 359.9 | -33.3 | 2.7 | Th |
| CM124-3 | 262/39 | 12.4 | 5     | 5.9  | 7.3   | -32   | 4   | Th |
| CM124-4 | 262/39 | 12.4 | 1.8   | 5.8  | 3.6   | -32.6 | 3   | Th |
| CM125-1 | 262/39 | 12.6 | 13    | 7.7  | 15.9  | -28.6 | 5   | Th |
| CM125-2 | 262/39 | 12.6 | 14.5  | 7.4  | 17.6  | -28.4 | 3.7 | Th |
| CM126   | 262/39 | 13   | 12.2  | 19.1 | 12    | -17.7 | 3.5 | Th |
| CM127-1 | 262/39 | 13.3 | 5.2   | 17.3 | 5.5   | -20.7 | 2.5 | Th |
| CM127-2 | 262/39 | 13.3 | 12.1  | 26.1 | 10.3  | -10.9 | 3.3 | Th |
| CM128-1 | 262/39 | 13.6 | 7.6   | 12.9 | 8.8   | -24.7 | 3.1 | Th |
| CM128-2 | 262/39 | 13.6 | 1.3   | 19.5 | 1.3   | -19.1 | 2.6 | Th |
| CM129-1 | 262/39 | 13.8 | 28.2  | 6.2  | 32.3  | -24.9 | 7.9 | Th |
| CM129-2 | 262/39 | 13.8 | 9.6   | 28.2 | 7.6   | -9.3  | 2.1 | Th |
| CM130-1 | 262/39 | 14.1 | 9     | 14.9 | 9.8   | -22.5 | 1.8 | Th |
| CM131-1 | 262/39 | 14.3 | 352.5 | 7.9  | 352.5 | -31.2 | 3   | Th |
| CM132-1 | 262/39 | 14.5 | 5.8   | 8.8  | 7.7   | -29   | 3.5 | Th |
| CM132-2 | 262/39 | 14.5 | 5.6   | 18.1 | 5.7   | -19.8 | 3   | Th |



|         |        |      |       |       |       |       |      |    |
|---------|--------|------|-------|-------|-------|-------|------|----|
| CM133-1 | 262/39 | 14.6 | 11.7  | 6.8   | 14.7  | -29.8 | 4.9  | Th |
| CM133-2 | 262/39 | 14.6 | 9.5   | 9.9   | 11.4  | -27.2 | 2.3  | Th |
| CM134-1 | 262/39 | 14.9 | 9.6   | 11.1  | 11.2  | -26   | 6.2  | Th |
| CM134-2 | 262/39 | 14.9 | 7.3   | 16.4  | 7.7   | -21.3 | 2    | Th |
| CM135-1 | 262/39 | 15   | 14.6  | 0.9   | 19.8  | -34.6 | 4.2  | Th |
| CM136-1 | 262/39 | 15.1 | 9.3   | 1.5   | 13.4  | -35.5 | 2.8  | Th |
| CM136-2 | 262/39 | 15.1 | 9.1   | 6.1   | 11.9  | -31   | 1.4  | Th |
| CM137-1 | 262/39 | 15.4 | 0.1   | 10.2  | 1     | -28.4 | 2.7  | Th |
| CM152   | 262/41 | 21.7 | 184.5 | -18.9 | 184.7 | 21.2  | 8.3  | Th |
| CM154   | 262/41 | 24   | 188.1 | -4.8  | 191.6 | 34.4  | 13.5 | Th |
| CM155-1 | 262/41 | 24.1 | 194.5 | -17.6 | 194.9 | 20.4  | 8.1  | Th |
| CM155-2 | 262/41 | 24.1 | 197.8 | -12.6 | 199.7 | 24.3  | 7.4  | Th |
| CM158-1 | 262/41 | 24.7 | 195.5 | -7.5  | 199.2 | 29.8  | 4.3  | Th |
| CM158-2 | 262/41 | 24.7 | 208.2 | -17.2 | 208.1 | 16.4  | 4    | Th |
| CM159-1 | 262/41 | 24.8 | 190.8 | -14.3 | 192.1 | 24.5  | 9.8  | Th |
| CM159-2 | 262/41 | 24.8 | 197.6 | -21.7 | 196.6 | 15.7  | 3.1  | Th |
| CM160   | 262/41 | 24.9 | 182.8 | -21.1 | 182.7 | 19.2  | 1    | Th |
| CM161-2 | 262/41 | 25   | 196.7 | -19.4 | 196.5 | 18.1  | 9.1  | Th |
| CM162-1 | 262/41 | 25.2 | 180.8 | -12   | 181.8 | 28.6  | 4.5  | Th |
| CM162-2 | 262/41 | 25.2 | 189.1 | -22.7 | 188.5 | 16.7  | 1.9  | Th |
| CM163   | 262/41 | 27.2 | 6.3   | 34.6  | 3.8   | -5.4  | 3.1  | Th |
| CM169-2 | 262/41 | 28.1 | 197.7 | -21.8 | 196.7 | 15.6  | 4.4  | Th |

261 Abbreviations are: Strike/dip, right hand strike and dip of beds;  $D_g$  and  $I_g$  ( $D_s$  and  $I_s$ )  
262 are declination and inclination in-situ (tilt-corrected), respectively; MAD, Maximum  
263 angular deviation from principal component analysis; Demag, demagnetization  
264 methods used; Th, Thermal demagnetization.

265

266  
267

**Supplementary Table 2.** Anisotropy of isothermal remanent magnetization of the CORBs samples collected from Cailangba B section.

| Site   | Sample ID | IRMz/IRMx<br>(acquired<br>between 200<br>and 1000mT) | IRMz/IRMx<br>Acquired above 650°C | Average IRMz/IRMx<br>Acquired above 650°C |
|--------|-----------|------------------------------------------------------|-----------------------------------|-------------------------------------------|
|        | CMC109-1  | 0.6619                                               | 0.6176                            |                                           |
|        | CMC109-2  | 0.6644                                               | 0.6544                            |                                           |
| CMC109 | CMC109-3  | 0.6569                                               | 0.6224                            | 0.6352                                    |
|        | CMC109-4  | 0.6847                                               | 0.6544                            |                                           |
|        | CMC109-5  | 0.6519                                               | 0.6273                            |                                           |
|        | CMC117-1  | 0.6519                                               | 0.6322                            |                                           |
|        | CMC117-2  | 0.6395                                               | 0.6273                            |                                           |
| CMC117 | CMC117-3  | 0.6899                                               | 0.6694                            | 0.6343                                    |
|        | CMC117-4  | 0.6694                                               | 0.6249                            |                                           |
|        | CMC117-5  | 0.6950                                               | 0.6176                            |                                           |
|        | CMC124-1  | 0.6273                                               | 0.6200                            |                                           |
| CMC124 | CMC124-2  | 0.6720                                               | 0.6445                            | 0.6371                                    |
|        | CMC124-3  | 0.6847                                               | 0.6469                            |                                           |
|        | CMC130-1  | 0.6644                                               | 0.6469                            |                                           |
|        | CMC130-2  | 0.7159                                               | 0.6873                            |                                           |
| CMC130 | CMC130-3  | 0.7002                                               | 0.6594                            | 0.6820                                    |
|        | CMC130-4  | 0.7454                                               | 0.7186                            |                                           |
|        | CMC130-5  | 0.6976                                               | 0.6976                            |                                           |
|        | CMC137-1  | 0.7054                                               | 0.6420                            |                                           |
|        | CMC137-2  | 0.7373                                               | 0.7346                            |                                           |
| CMC137 | CMC137-3  | 0.6771                                               | 0.6694                            | 0.6626                                    |
|        | CMC137-4  | 0.7028                                               | 0.6371                            |                                           |
|        | CMC137-5  | 0.7028                                               | 0.6297                            |                                           |

**Sample-mean inclination: 25.9°**

**Average IRMz/IRMx (acquired above 650°C) of sampling section: 0.6502**

**Corrected site-mean inclination: 36.6°**

268  
269  
270  
271

Abbreviations are: IRMz, Isothermal remanent magnetization of perpendicular bedding. IRMx, Isothermal remanent magnetization of parallel bedding.

272  
273

**Supplementary Table 3.** Anisotropy of isothermal remanent magnetization of the Sangdanlin red siliceous shales.

| Site  | Sample ID | $I_{obs}$<br>( $^{\circ}$ ) | IRMz/IRMx<br>(acquired<br>between 200<br>and 800 mT) | IRMz/IRMx<br>Acquired above 650 $^{\circ}$ C | Average IRMz/IRMx<br>Acquired above 650 $^{\circ}$ C |
|-------|-----------|-----------------------------|------------------------------------------------------|----------------------------------------------|------------------------------------------------------|
| SES8  | SES8-1    | 23.7                        | 0.7481                                               | 0.8127                                       | 0.8256                                               |
|       | SES8-2    |                             | 0.8511                                               | 0.8098                                       |                                                      |
|       | SES8-3    |                             | 1.0000                                               | 0.9827                                       |                                                      |
|       | SES8-4    |                             | 0.7646                                               | 0.7319                                       |                                                      |
|       | SES8-5    |                             | 0.7373                                               | 0.8098                                       |                                                      |
|       | SES8-6    |                             | 0.9930                                               | 0.9759                                       |                                                      |
|       | SES8-7    |                             | 0.7400                                               | 0.6976                                       |                                                      |
|       | SES8-8    |                             | 0.8693                                               | 0.7841                                       |                                                      |
| SES9  | SES9-1    | 21.2                        | 0.7373                                               | 0.7054                                       | 0.6682                                               |
|       | SES9-2    |                             | 0.7618                                               | 0.6569                                       |                                                      |
|       | SES9-3    |                             | 0.6694                                               | 0.6104                                       |                                                      |
|       | SES9-4    |                             | 0.7028                                               | 0.6796                                       |                                                      |
|       | SES9-5    |                             | 0.9523                                               | 0.8511                                       |                                                      |
|       | SES9-6    |                             | 0.7373                                               | 0.5774                                       |                                                      |
|       | SES9-7    |                             | 0.7054                                               | 0.6445                                       |                                                      |
|       | SES9-8    |                             | 0.7002                                               | 0.6200                                       |                                                      |
| SES10 | SES10-1   | 29                          | 0.6899                                               | 0.5317                                       | 0.6322                                               |
|       | SES10-2   |                             | 0.8302                                               | 0.6544                                       |                                                      |
|       | SES10-3   |                             | 0.8243                                               | 0.6224                                       |                                                      |
|       | SES10-4   |                             | 0.8451                                               | 0.7841                                       |                                                      |
|       | SES10-5   |                             | 0.7785                                               | 0.5727                                       |                                                      |
|       | SES10-6   |                             | 0.8693                                               | 0.6494                                       |                                                      |
|       | SES10-7   |                             | 0.7212                                               | 0.6249                                       |                                                      |
|       | SES10-8   |                             | 0.8040                                               | 0.6176                                       |                                                      |
| SES13 | SES13-1   | 12.8                        | 0.7427                                               | 0.6080                                       | 0.6671                                               |
|       | SES13-2   |                             | 0.7536                                               | 0.6720                                       |                                                      |
|       | SES13-3   |                             | 0.7133                                               | 0.7159                                       |                                                      |
|       | SES13-4   |                             | 0.7133                                               | 0.6494                                       |                                                      |
|       | SES13-5   |                             | 0.7028                                               | 0.6494                                       |                                                      |
|       | SES13-6   |                             | 0.7926                                               | 0.7159                                       |                                                      |
|       | SES13-7   |                             | 0.6297                                               | 0.6346                                       |                                                      |
|       | SES13-8   |                             | 0.6924                                               | 0.6371                                       |                                                      |
|       | SES13-9   |                             | 0.7028                                               | 0.7212                                       |                                                      |

**Site-mean inclination: 18.8  $^{\circ}$**

**Average IRMz/IRMx (acquired above 650  $^{\circ}$ C) of sampling section: 0.6982**

**Corrected site-mean inclination: 26.0  $^{\circ}$**

274  
275  
276  
277

Abbreviations are:  $I_{obs}$ , Observed mean inclination of sampling sites. IRMz, Isothermal remanent magnetization of perpendicular bedding. IRMx, Isothermal remanent magnetization of parallel bedding.

**Supplementary Table 4.** The selected Cretaceous and Paleogene paleomagnetic poles from the Lhasa and Tethyan Himalaya terranes.

| ID                                     | Site<br>(N/E) | Time<br>(Ma) | N/n    | Observed   |            |                      | Paleopole   |             |                     | Paleolat<br>(°) | Rock<br>type | Reliability criteria |   |   |        |   |   |   | Inclination<br>shallowing<br>correction | Rock<br>magnetic<br>analysis | Reference |                          |
|----------------------------------------|---------------|--------------|--------|------------|------------|----------------------|-------------|-------------|---------------------|-----------------|--------------|----------------------|---|---|--------|---|---|---|-----------------------------------------|------------------------------|-----------|--------------------------|
|                                        |               |              |        | Dec<br>(°) | Inc<br>(°) | $\alpha_{95}$<br>(°) | Plat<br>(°) | Plon<br>(°) | $A_{95}$<br>(dp/dm) |                 |              | 1                    | 2 | 3 | 4      | 5 | 6 | 7 |                                         |                              |           | Q                        |
| <b>Lhasa terrane</b>                   |               |              |        |            |            |                      |             |             |                     |                 |              |                      |   |   |        |   |   |   |                                         |                              |           |                          |
| At Reference Position (29.3°N, 85.3°E) |               |              |        |            |            |                      |             |             |                     |                 |              |                      |   |   |        |   |   |   |                                         |                              |           |                          |
| 1                                      | 30.0/91.1     | E(53)        | 9/-    | 15.4       | 27.2       | 9.7                  | 68.9        | 225.4       | 7.8                 | 12.5±7.8        | Dy           | +                    | + | + | +(F)   | + | + | + | 7                                       | -                            | +         | Liebke et al. [27]       |
| 2                                      | 30.0/91.1     | E(54-47)     | 24/195 | 12.5       | 39.4       | 5.3                  | 76.4        | 212.6       | 5                   | 20.6±5.0        | V            | +                    | + | + | +(F)   | + | + | + | 7                                       | -                            | +         | Dupont-Nivet et al. [28] |
| 3                                      | 30.0/91.0     | E            | 8/46   | 350.9      | 25.5       | 11                   | 71.4        | 299.8       | 11                  | 13.6±1          | V            | +                    | + | + | +(F)   | + | + | + | 7                                       | -                            | -         | Achache et al. [29]      |
| 4                                      | 30.1/90.9     | P-E(55)      | 14/99  | 359        | 26.1       | 9.2                  | 73.6        | 274.3       | 7.3                 | 13.1±7.3        | V            | +                    | + | + | +(F,R) | + | + | + | 7                                       | -                            | +         | Sun et al. [30]          |
| 5                                      | 29.9/84.3     | P-E(57-54)   | -/62   | 348.1      | 42         | 7.1                  | 78          | 329         | 5.9                 | 23.5±5.9        | S            | +                    | + | + | +(F)   | + | - | + | 6                                       | CV                           | +         | Meng et al. [31]         |
| 6                                      | 30.0/91.1     | E(50-44)     | 18/-   | 12.3       | 23.2       | 7.2                  | 69.1        | 234.2       | 5.6                 | 11.0±5.6        | V            | +                    | + | + | +(F)   | + | + | + | 7                                       | -                            | +         | Chen et al. [32]         |
| 7                                      | 31.3/95.9     | K2           | 15/-   | 0.9        | 24.3       | 5.6                  | 71.4        | 273.1       | 5.2                 | 10.9±5.2        | Rb           | +                    | + | + | +(F)   | + | - | + | 6                                       | A                            | +         | Tong et al. [33]         |
| 8                                      | 31.2/84.7     | K2           | 33/291 | 316.8      | 30.2       | 5.4                  | 49          | 344.3       | 5.3                 | 15.1±5.3        | Rb           | +                    | + | + | +(F)   | + | - | + | 6                                       | CV                           | +         | Yang et al. [34]         |
| 9                                      | 29.9/90.7     | K2           | 20/126 | 350.8      | 32.1       | 8.1                  | 75          | 306.7       | 6.8                 | 17.7±6.8        | Rb+V         | +                    | + | + | +(F)   | + | - | + | 6                                       | CV                           | +         | Sun et al. [35]          |
| 10                                     | 29.9/91.2     | K2           | 43/377 | 350.2      | 23.5       | 2.5                  | 70.2        | 300.5       | 2.2                 | 12.7±2.2        | Rb           | +                    | + | + | +(F)   | + | + | + | 7                                       | -                            | -         | Tan et al. [36]          |
| 11                                     | 31.6/82.2     | K2(-80)      | 15/-   | 346.6      | 25.6       | 3.5                  | 68.4        | 298.8       | 2.7                 | 10.8±2.7        | V            | +                    | + | + | +(F)   | + | - | + | 6                                       | -                            | +         | Yi et al. [37]           |
| 12                                     | 32.4/80.1     | K2(-92)      | 10/-   | 21.1       | 26.8       | 10                   | 64.1        | 209         | 9.6                 | 13.2±9.6        | V            | +                    | + | + | +(F,R) | + | + | + | 7                                       | -                            | +         | Yi et al. [37]           |
| 13                                     | 29.9/91.1     | K2(-70)      | 21/-   | 0.5        | 20.2       | 6.4                  | 70.5        | 269.6       | 4.9                 | 9.8±4.9         | Rb+V         | +                    | + | + | +(F,R) | + | + | + | 7                                       | CV                           | +         | Cao et al. [38]          |
| 14                                     | 32.3/80.1     | K2(67-72)    | 17/-   | 43.3       | 30.3       | 6.9                  | 47.8        | 181.4       | 6.4                 | 17.5±6.4        | V            | +                    | + | + | +(F)   | + | - | + | 6                                       | -                            | +         | Ma et al. [39]           |
| 15                                     | 31.1/84.4     | K1(121-117)  | 12/116 | 350.5      | 25.5       | 7.7                  | 70.5        | 292.9       | 7.4                 | 11.7±7.4        | V            | +                    | + | + | +(F)   | + | - | + | 6                                       | -                            | +         | Yang et al. [34]         |
| 16                                     | 32.3/82.6     | K1(132-120)  | 51/444 | 28.2       | 34.5       | 2.3                  | 61.4        | 192.9       | 2.1                 | 17.7±2.1        | V            | +                    | + | + | +(F)   | + | + | + | 7                                       | -                            | +         | Ma et al. [40]           |
| 17                                     | 31.3/85.1     | K1(130-110)  | 18/162 | 327        | 35.7       | 4.5                  | 58.2        | 341.9       | 4.6                 | 18.0±4.6        | V            | +                    | + | + | +(F,R) | + | + | + | 7                                       | -                            | +         | Chen et al. [41]         |
| 18                                     | 31.3/91.9     | K1(-120.2)   | 19/163 | 356.4      | 16.4       | 6.3                  | 66.9        | 281.2       | 6.1                 | 7.0±6.1         | S+V          | +                    | + | + | +(F)   | + | + | + | 7                                       | -                            | +         | Li et al. [42]           |
| 19                                     | 32.2/80.4     | K1(116-113)  | 19/164 | 340.9      | 36         | 4.6                  | 69.1        | 319.8       | 4.8                 | 16.1±4.8        | V+Li         | +                    | + | + | +(F)   | + | - | + | 6                                       | CV                           | +         | Bian et al. [43]         |
| <b>Tethyan Himalaya terrane</b>        |               |              |        |            |            |                      |             |             |                     |                 |              |                      |   |   |        |   |   |   |                                         |                              |           |                          |
| At Reference Position (29.3°N, 85.3°E) |               |              |        |            |            |                      |             |             |                     |                 |              |                      |   |   |        |   |   |   |                                         |                              |           |                          |
| 1                                      | 28.3/88.5     | P(59-56)     | 14/142 | 357        | 19.6       | 3.5                  | 71.6        | 277.8       | 2.5                 | 11.3±2.5        | Li           | +                    | + | + | +(F,R) | + | + | + | 7                                       | -                            | +         | Yi et al. [44]           |
| 2                                      | 28.3/88.5     | P(62-59)     | 18/171 | 0.8        | 11.1       | 4.2                  | 67.3        | 266.3       | 3.5                 | 6.6±3.5         | Li           | +                    | + | + | +(F,R) | + | + | + | 7                                       | -                            | +         | Yi et al. [44]           |
| 3                                      | 28.3/88.5     | P(63-55)     | 14/113 | 356.2      | 7.9        | 7.5                  | 65.4        | 277.6       | 3.8/7.6             | 5.2±3.8         | Li           | +                    | + | + | +(F,R) | + | + | + | 7                                       | -                            | +         | Patzelt et al. [45]      |

|          |                  |                      |              |              |            |            |             |              |            |                  |           |          |          |          |               |          |          |          |          |              |          |                            |                  |
|----------|------------------|----------------------|--------------|--------------|------------|------------|-------------|--------------|------------|------------------|-----------|----------|----------|----------|---------------|----------|----------|----------|----------|--------------|----------|----------------------------|------------------|
| 4        | 28.7/87.2        | P                    | 4/28         | 335.5        | -5.9       | 10.6       | 50.6        | 307.9        | 5.3/10.6   | -1.7±5.3         | Li        | +        | -        | +        | +(F)          | +        | -        | +        | 5        | -            | -        | Besse et al. [46]          |                  |
| 5        | 28.7/86.8        | P                    | 3/15         | 162.4        | 29.1       | 6.6        | 42.6        | 280.1        | 4.0/7.3    | -16.8±4.0        | Li        | +        | -        | +        | +(F)          | +        | -        | +        | 5        | -            | -        | Tong et al. [47]           |                  |
| <b>6</b> | <b>29.3/85.3</b> | <b>P(62.5-59.2)</b>  | <b>-/86</b>  | <b>176.3</b> | <b>-26</b> | <b>2.6</b> | <b>74</b>   | <b>278.5</b> | <b>2.5</b> | <b>13.7±2.5</b>  | <b>Rb</b> | <b>+</b> | <b>+</b> | <b>+</b> | <b>+(F,R)</b> | <b>+</b> | <b>+</b> | <b>+</b> | <b>7</b> | <b>A</b>     | <b>+</b> | <b>This study</b>          |                  |
| 7        | 28.3/88.5        | K2(71-65)            | 14/156       | 4            | -11.2      | 8.5        | 55.8        | 261.4        | 4.4/8.6    | -4.8±4.4         | Li        | +        | +        | +        | +(F,R)        | +        | +        | +        | 7        | -            | +        | Patzelt et al. [45]        |                  |
| <b>8</b> | <b>28.9/89.2</b> | <b>K2(76.2-74.0)</b> | <b>-/127</b> | <b>10.3</b>  | <b>-35</b> | <b>2.1</b> | <b>40.8</b> | <b>256.3</b> | <b>1.8</b> | <b>-19.4±1.8</b> | <b>Rb</b> | <b>+</b> | <b>+</b> | <b>+</b> | <b>+(R)</b>   | <b>+</b> | <b>+</b> | <b>+</b> | <b>7</b> | <b>E/I,A</b> | <b>+</b> | <b>This study</b>          |                  |
| 9        | 29.7/84.0        | K1(120.8-93.9)       | 12/53        | 341.7        | -51.7      | 4.7        | 25          | 285.7        | 4.8/7.1    | -32.3±4.8        | Rb        | +        | +        | +        | +(R)          | +        | +        | +        | 7        | A            | +        | Qin et al. [48]            |                  |
| 10       | 28.1/92.4        | K1(134-131)          | 31/225       | 261.6        | -68.5      | 3.6        | -26.8       | 315.2        | 5.7        | -46.2±5.7        | V         | +        | +        | +        | +(F,R)        | +        | +        | +        | 7        | -            | +        | Yang et al. [49]           |                  |
| 11       | 28.8/91.3        | K1(135-124)          | 26/216       | 296.1        | -65.7      | 4          | -5.9        | 308          | 6.1        | -43.5±6.1        | V         | +        | +        | +        | +(F,R)        | +        | +        | +        | 7        | -            | +        | Ma et al. [50]             |                  |
| 12       | 28.9/91.3        | K1(138-135)          | 31/-         | 321.2        | -68.7      | 4.4        | 0.9         | 293.4        | 7          | -49.6±7.0        | V         | +        | +        | +        | +(F,R)        | +        | +        | +        | 7        | -            | +        | Bian et al. [51]           |                  |
| 13       | 28.8/83.8        | K1                   | -/95         | 326          | -61.5      | 5          | 12          | 288.7        | 6.0/7.5    | -42.9±6.0        | S         | +        | +        | +        | -             | +        | -        | +        | 5        | -            | -        | Klootwijk and Bingham [52] |                  |
| 14       | 28.5/87.0        | K1                   | -/201        | 19.7         | -71        | 3          | 4.4         | 256          | 3          | -55.1±3.0        | S         | +        | +        | +        | -             | +        | -        | +        | 5        | -            | +        | Huang et al. [53]          |                  |
| 15       | 28.1/92.4        | K1(~131.1)           | 8/-          | 7.3          | -56.8      | 16.1       |             | 22           | 266.7      | 7.6              | -38.7±7.6 | V        | +        | +        | +             | +(F)     | +        | +        | +        | 7            | -        | +                          | Meng et al. [54] |
| 16       | 28.1/92.4        | K1                   | 20/-         | 6.4          | -57.8      | 6          |             |              |            |                  | Li        | +        | +        | +        | +(F,R)        | +        | +        | +        | 7        | E/I          | +        | Meng et al. [54]           |                  |
| 17       | 29.7/83.6        | K1                   | -/53         | 3.1          | -47.8      | 4.4        | 29.7        | 260.1        | 4.9        | -30.8±4.9        | S+Ch      | +        | +        | +        | +(F,R)        | +        | +        | +        | 7        | E/I          | +        | Meng et al. [54]           |                  |

| India APWP |     | At Reference Position (29.3°N, 85.3°E) |  |  |  |  |      |       |     |           |  |  |  |  |  |  |  |  |  |  |                     |
|------------|-----|----------------------------------------|--|--|--|--|------|-------|-----|-----------|--|--|--|--|--|--|--|--|--|--|---------------------|
| 1          | 40  |                                        |  |  |  |  | 74.7 | 286.8 | 2.9 | 14.9±2.9  |  |  |  |  |  |  |  |  |  |  | Torsvik et al. [55] |
| 2          | 50  |                                        |  |  |  |  | 65.1 | 278.4 | 2.8 | 4.9±2.8   |  |  |  |  |  |  |  |  |  |  | Torsvik et al. [55] |
| 3          | 60  |                                        |  |  |  |  | 48.5 | 280.9 | 2.1 | -11±2.1   |  |  |  |  |  |  |  |  |  |  | Torsvik et al. [55] |
| 4          | 70  |                                        |  |  |  |  | 36.4 | 280.7 | 2.5 | -22.7±2.5 |  |  |  |  |  |  |  |  |  |  | Torsvik et al. [55] |
| 5          | 80  |                                        |  |  |  |  | 29.1 | 283.5 | 2.9 | -29.1±2.9 |  |  |  |  |  |  |  |  |  |  | Torsvik et al. [55] |
| 6          | 90  |                                        |  |  |  |  | 20.9 | 291.4 | 2.5 | -33.9±2.5 |  |  |  |  |  |  |  |  |  |  | Torsvik et al. [55] |
| 7          | 100 |                                        |  |  |  |  | 19.7 | 293   | 3.3 | -34.2±3.3 |  |  |  |  |  |  |  |  |  |  | Torsvik et al. [55] |
| 8          | 110 |                                        |  |  |  |  | 11   | 295.9 | 3.3 | -40±3.3   |  |  |  |  |  |  |  |  |  |  | Torsvik et al. [55] |
| 9          | 120 |                                        |  |  |  |  | 8.6  | 296.4 | 2.6 | -41.7±2.6 |  |  |  |  |  |  |  |  |  |  | Torsvik et al. [55] |
| 10         | 130 |                                        |  |  |  |  | -1.1 | 297.1 | 2.8 | -48.6±2.8 |  |  |  |  |  |  |  |  |  |  | Torsvik et al. [55] |

279 Abbreviations are: ID, Serial number; Time (Ma): K2, Late Cretaceous. K1, Early Cretaceous. P, Paleocene. E, Eocene; n/N, number of samples  
280 or sites used to calculate Fisher mean; Dec and Inc are declination and inclination, respectively; Plat and Plong are latitude and longitude of

281 paleopoles;  $\alpha_{95}$  and  $A_{95}$  is the radius of cone at 95% confidence level about the mean direction,  $A_{95} = (dp \cdot dm)^{0.5}$ ; Paleolat is the paleolatitude  
282 calculated for the reference point at 29.3 °N, 85.3 °E; Rock type: Rb, Red-beds; S, sandstone; Li, limestone; V, volcanic rock; D, dyke; Ch, chert.  
283 Data reliability criteria is after: 1, well-determined rock age and a presumption that magnetization is the same age; 2, sufficient quantity of  
284 samples ( $n > 50$  specimens or  $N > 5$  sites) and adequate statistical precision,  $k$  (or  $K$ )  $\geq 10$  and  $\alpha_{95} (A_{95}) \leq 16.0$ ; 3, detailed demagnetization and  
285 isolation of magnetic components; 4, positive field stability tests; 5, structural control and tectonic coherence with craton or block involved; 6,  
286 presence of reversals; 7, no resemblance to paleopoles of younger age (by more than a period) [56]. Q, the reliability factor; “+” in the criterion  
287 column means fulfilling this criterion; “-” in the criterion column means failing to fulfill this criterion. Field tests: F means positive fold test, R  
288 means positive reversal test; Inclination shallowing correction: E/I, E/I inclination shallowing correction; A, anisotropy-based inclination  
289 correction; CV, consistent with the paleomagnetic data obtained from volcanic rocks in the same study; Rock magnetic analysis, “+” means  
290 fulfilling this criterion; “-” means failing to fulfill this criterion.

## 291 **Supplementary References**

- 292 1. Yin A and Harrison TM. Geologic evolution of the Himalayan-Tibetan orogen.  
293 *Annu Rev Earth Planet Sci* 2000; **28**: 211–280.
- 294 2. Ding L, Kapp P and Wan X. Paleocene–Eocene record of ophiolite obduction and  
295 initial India-Asia collision, south central Tibet. *Tectonics* 2005; **24**: TC3001.
- 296 3. Burg JP, Leyreloup A and Girardeau J *et al.* Structure and metamorphism of a  
297 tectonically thickened continental crust: The Yalu Tsangpo suture (Tibet). *Philos*  
298 *Trans R Soc Lond* 1987; **321**: 67–86.
- 299 4. An W, Hu X and Garzanti E *et al.* Xigaze forearc basin revisited (South Tibet):  
300 Provenance changes and origin of the Xigaze Ophiolite. *Geol Soc Am Bull* 2014;  
301 **126**: 1595–1613.
- 302 5. Liu G and Einsele G. Sedimentary history of the Tethyan basin in the Tibetan  
303 Himalayas. *Geol Rundsch* 1994; **83**: 32–61.
- 304 6. Chen X, Wang C and Kuhnt W *et al.* Lithofacies, microfacies and depositional  
305 environments of Upper Cretaceous Oceanic red beds (Chuangde Formation) in  
306 southern Tibet. *Sed Geol* 2011; **235**: 100–110.
- 307 7. Li X, Wang C and Hu X. Stratigraphy of deep-water Cretaceous deposits in  
308 Gyangze, southern Tibet, China. *Cretaceous Res* 2005; **26**: 33–41.
- 309 8. Wan X, Lamolda MA and Si J *et al.* Foraminiferal stratigraphy of Late Cretaceous  
310 red beds in southern Tibet. *Cretaceous Res* 2005; **26**: 43–48.
- 311 9. Hu X, Wang C and Li X *et al.* Upper Cretaceous oceanic red beds in southern  
312 Tibet: Lithofacies, environments and colour origin. *Sci China Ser D-Earth Sci*  
313 2006; **49**: 785–795.
- 314 10. DeCelles PG, Kapp P and Gehrels GE *et al.* Paleocene–Eocene foreland basin  
315 evolution in the Himalaya of southern Tibet and Nepal: implications for the age of

- 316 initial India-Asia collision. *Tectonics* 2014; **33**: 824–849.
- 317 11. Ding L, Kapp P and Wan X. Paleocene–Eocene record of ophiolite obduction and  
318 initial India-Asia collision, south central Tibet. *Tectonics* 2005; **24**: TC3001.
- 319 12. Wang J, Hu X and Jansa L *et al.* Provenance of the Upper Cretaceous-Eocene  
320 deep-water sandstones in Sangdanlin, southern Tibet: Constraints on the timing of  
321 initial India-Asia collision. *J Geol* 2011; **119**: 293–309.
- 322 13. Hu X, Garzanti E and Moore T *et al.* Direct stratigraphic dating of India-Asia  
323 collision onset at the Selandian (middle Paleocene,  $59 \pm 1$  Ma). *Geology* 2015; **43**:  
324 859–862.
- 325 14. Wu FY, Ji WQ and Wang JG *et al.* Zircon U-Pb and Hf isotopic constraints on the  
326 onset time of India-Asia collision. *Am J Sci* 2014; **314**: 548–579.
- 327 15. Li S, Deng C and Paterson GA *et al.* Tectonic and sedimentary evolution of the  
328 late Miocene–Pleistocene Dali Basin in the southeast margin of the Tibetan  
329 Plateau: Evidences from anisotropy of magnetic susceptibility and rock magnetic  
330 data. *Tectonophysics* 2014; **629**: 362–377.
- 331 16. McElhinny MW. Statistical significance of the fold test in paleomagnetism.  
332 *Geophys J R Astron Soc* 1964; **8**: 338–340.
- 333 17. McFadden PL. A new fold test for paleomagnetic studies. *Geophys J Int* 1990; **103**:  
334 163–169.
- 335 18. Watson GS and Enkin RJ. The fold test in paleomagnetism as a parameter  
336 estimation problem. *Geophys Res Lett* 1993; **20**: 2135–2137.
- 337 19. Tong Y, Yang Z and Mao C *et al.* Paleomagnetism of Eocene red-beds in the  
338 eastern part of the Qiangtang Terrane and its implications for uplift and southward  
339 crustal extrusion in the southeastern edge of the Tibetan Plateau. *Earth Planet Sci*  
340 *Lett* 2017; **475**: 1–14.



- 341 20. Ingalls M, Rowley DB and Currie B *et al.* Large-scale subduction of continental  
342 crust implied by India–Asia mass-balance calculation. *Nat Geosci* 2016; **9**: 848–  
343 853.
- 344 21. Meng J, Gilder SA and Wang C *et al.* Defining the limits of Greater India.  
345 *Geophys Res Lett* 2019; **46**: 4182–4191.
- 346 22. van Hinsbergen DJJ, Lippert PC and Dupont-Nivet G *et al.* Greater India Basin  
347 hypothesis and a two-stage Cenozoic collision between India and Asia. *Proc Natl*  
348 *Acad Sci USA* 2012; **109**: 7659–7664.
- 349 23. van Hinsbergen DJJ, Lippert PC and Li S *et al.* Reconstructing Greater India:  
350 Paleogeographic, kinematic, and geodynamic perspectives. *Tectonophysics* 2019;  
351 **760**: 69–94.
- 352 24. Aitchison JC, Ali JR and Davis AM. When and where did India and Asia collide?  
353 *J Geophys Res* 2007; **112**: B05423.
- 354 25. Kapp P and DeCelles PG. Mesozoic–Cenozoic geological evolution of the  
355 Himalayan-Tibetan orogen and working tectonic hypotheses. *Am J Sci* 2019; **319**:  
356 159–254.
- 357 26. Gradstein FM, Ogg JG and Schmitz M *et al.* *The Geologic Time Scale 2012*.  
358 Amsterdam: Elsevier, 2012.
- 359 27. Liebke U, Appel E and Ding L *et al.* Position of the Lhasa terrane prior to  
360 India-Asia collision derived from palaeomagnetic inclinations of 53 Ma old dykes  
361 of the Linzhou Basin: constraints on the age of collision and postcollisional  
362 shortening within the Tibetan Plateau. *Geophys J Int* 2010; **182**: 1199–1215.
- 363 28. Dupont-Nivet G, Lippert PC and van Hinsbergen DJJ *et al.* Paleolatitude and age  
364 of the Indo-Asia collision: paleomagnetic constraints. *Geophys J Int* 2010; **182**:  
365 1189–1198.

- 366 29. Achache J, Courtillot V and Zhou YX. Paleogeographic and tectonic evolution of  
367 southern Tibet since middle Cretaceous time: New paleomagnetic data and  
368 synthesis. *J Geophys Res* 1984; **89**: 10,311–10,339.
- 369 30. Sun Z, Jiang W and Li H *et al.* New paleomagnetic results of Paleocene volcanic  
370 rocks from the Lhasa block: tectonic implications for the collision of India and  
371 Asia. *Tectonophysics* 2010; **490**: 257–266.
- 372 31. Meng J, Wang C and Zhao X *et al.* India-Asia collision was at 24 °N and 50 Ma:  
373 palaeomagnetic proof from southernmost Asia. *Sci Rep* 2012; **2**: 925.
- 374 32. Chen J, Huang B and Yi Z *et al.* Paleomagnetic and  $^{40}\text{Ar}/^{39}\text{Ar}$  geochronological  
375 results from the Linzizong group, Linzhou Basin, Lhasa Terrane, Tibet:  
376 implications to Paleogene paleolatitude and onset of the India–Asia collision. *J*  
377 *Asian Earth Sci* 2014; **96**: 162–177.
- 378 33. Tong Y, Yang Z and Pei J *et al.* Paleomagnetism of the Upper Cretaceous red-beds  
379 from the eastern edge of the Lhasa Terrane: New constraints on the onset of the  
380 India-Eurasia collision and latitudinal crustal shortening in southern Eurasia.  
381 *Gondwana Res* 2017; **48**: 86–100.
- 382 34. Yang T, Ma Y and Zhang S *et al.* New insights into the India-Asia collision  
383 process from Cretaceous paleomagnetic and geochronologic results in the Lhasa  
384 terrane. *Gondwana Res* 2015; **28**: 625–641.
- 385 35. Sun Z, Pei J and Li H *et al.* Palaeomagnetism of late Cretaceous sediments from  
386 southern Tibet: evidence for the consistent palaeolatitudes of the southern margin  
387 of Eurasia prior to the collision with India. *Gondwana Res* 2012; **21**: 53–63.
- 388 36. Tan X, Gilder S and Kodama KP *et al.* New paleomagnetic results from the Lhasa  
389 block: revised estimation of latitudinal shortening across Tibet and implications  
390 for dating the India-Asia collision. *Earth Planet Sci Lett* 2010; **293**: 396–404.

- 391 37. Yi Z, Huang B and Yang L *et al.* A quasi-linear structure of the southern margin of  
392 Eurasia prior to the India-Asia collision: First paleomagnetic constraints from  
393 Upper Cretaceous volcanic rocks near the western syntaxis of Tibet. *Tectonics*  
394 2015; **34**: 1431–1451.
- 395 38. Cao Y, Sun Z and Li H *et al.* New Late Cretaceous paleomagnetic data from  
396 volcanic rocks and red siliceous shales from the Lhasa terrane and its implications  
397 for the paleolatitude of the southern margin of Asia prior to the collision with  
398 India. *Gondwana Res* 2017; **41**: 337–351.
- 399 39. Ma Y, Yang T and W. Bian *et al.* Paleomagnetic and geochronologic results of  
400 latest Cretaceous lava flows from the Lhasa terrane and their tectonic implications.  
401 *J Geophys Res Solid Earth* 2017; **122**: 8786–8809.
- 402 40. Ma Y, Yang T and Yang Z *et al.* Paleomagnetism and U-Pb zircon geochronology  
403 of Lower Cretaceous lava flows from the western Lhasa terrane: new constraints  
404 on the India-Asia collision process and intracontinental deformation within Asia. *J*  
405 *Geophys Res Solid Earth* 2014; **119**: 7404–7424.
- 406 41. Chen W, Yang T and Zhang S *et al.* Paleomagnetic results from the Early  
407 Cretaceous Zenong Group volcanic rocks, Cuoqin, Tibet, and their  
408 paleogeographic implications. *Gondwana Res* 2012; **22**: 461–469.
- 409 42. Li Z, Ding L and Song P *et al.* Paleomagnetic constraints on the paleolatitude of  
410 the Lhasa block during the Early Cretaceous: Implications for the onset of  
411 India-Asia collision and latitudinal shortening estimates across Tibet and stable  
412 Asia. *Gondwana Res* 2017; **41**: 352–372.
- 413 43. Bian W, Yang T and Ma Y *et al.* New Early Cretaceous palaeomagnetic and  
414 geochronological results from the far western Lhasa terrane: Contributions to the  
415 Lhasa-Qiangtang collision. *Sci Rep* 2017; **7**: 16216.

- 416 44. Yi Z, Huang B and Chen J *et al.* Paleomagnetism of early Paleogene marine  
417 sediments in southern Tibet, China: Implications to onset of the India-Asia  
418 collision and size of Greater India. *Earth Planet Sci Lett* 2011; **309**: 153–165.
- 419 45. Patzelt A, Li H and Wang J *et al.* Palaeomagnetism of Cretaceous to Tertiary  
420 sediments from southern Tibet: evidence for the extent of the northern margin of  
421 India prior to the collision with Eurasia. *Tectonophysics* 1996; **259**: 259–284.
- 422 46. Besse J, Courtillot V and Pozzi JP *et al.* Paleomagnetic estimates of crustal  
423 shortening in the Himalayan thrusts and Zangbo suture. *Nature* 1984; **311**: 621–  
424 626.
- 425 47. Tong Y, Yang Z and Zheng L *et al.* Early Paleocene paleomagnetic results from  
426 southern Tibet, and tectonic implications. *Int Geol Rev* 2008; **50**: 546–562.
- 427 48. Qin SX, Li YX and Li XH *et al.* Paleomagnetic results of Cretaceous cherts from  
428 Zhongba, southern Tibet: New constraints on the India-Asia collision. *J Asian  
429 Earth Sci* 2019; **173**: 42–53.
- 430 49. Yang T, Ma Y and Bian W *et al.* Paleomagnetic results from the Early Cretaceous  
431 Lakang Formation lavas: constraints on the paleolatitude of the Tethyan Himalaya  
432 and the India–Asia collision. *Earth Planet Sci Lett* 2015; **428**: 120–133.
- 433 50. Ma Y, Yang T and Bian W *et al.* Early Cretaceous paleomagnetic and  
434 geochronologic results from the Tethyan Himalaya: Insights into the Neotethyan  
435 paleogeography and the India–Asia collision. *Sci Rep* 2016; **6**: 21605.
- 436 51. Bian W, Yang T and Ma Y *et al.* Paleomagnetic and geochronological results from  
437 the Zhela and Weimei Formations lava flows of the eastern Tethyan Himalaya:  
438 New insights into the breakup of eastern Gondwana. *J Geophys Res Solid Earth*  
439 2019; **124**: 44–64.
- 440 52. Klootwijk CT and Bingham DK. The extent of greater India, III. Palaeomagnetic

- 441 data from the Tibetan Sedimentary series, Thakkhola region, Nepal Himalaya.  
442 *Earth Planet Sci Lett* 1980; **51**: 381–405.
- 443 53. Huang W, van Hinsbergen DJJ and Dekkers MJ *et al.* Paleolatitudes of the Tibetan  
444 Himalaya from primary and secondary magnetizations of Jurassic to Lower  
445 Cretaceous sedimentary rocks. *Geochem Geophys Geosyst* 2015; **16**: 77–100.
- 446 54. Meng J, Gilder SA and Wang C *et al.* Defining the Limits of Greater India.  
447 *Geophys Res Lett* 2019; **46**: 4182–4191.
- 448 55. Torsvik TH, Müller RD and van der Voo R *et al.* Phanerozoic polar wander,  
449 palaeogeography and dynamics. *Earth-Sci Rev* 2012; **114**: 325–368.
- 450 56. van der Voo R. The reliability of paleomagnetic data. *Tectonophysics* 1990; **184**:  
451 1–9.
